# Supplementary material
Source: publisher site journal article supplement (https://static.cambridge.org/content/id/urn:cambridge.org:id:article:S0016756820000485/resource/name/S0016756820000485supp002.docx)
Supplement: Supplementary file 1 [file S0016756820000485supp002.docx]

Supplementary Table 1. LA–ICP–MS U–Pb dating data for zircons from the samples collected from the Wulian complex in the Sulu Orogenic Belt, China.

| No | Conent (×10-6) | |  | isotopic ratios | | | | | | |  | Age (Ma) | | | | | |
| --- | --- | --- | --- | --- | --- | --- | --- | --- | --- | --- | --- | --- | --- | --- | --- | --- | --- |
| Th | U | Th/U | 207Pb/235U | 1σ | 206Pb/238U | 1σ | 207Pb/206Pb | 1σ | 206Pb/238U | 1σ | 207Pb/235U | 1σ | 207Pb/206Pb | 1σ |
| LX05-2 (quartzite) | | | | | | | | | | | | | | | | | |
| LX052-01 | 127.66 | 272.58 |  | 0.47 | 7.29291 | 0.12634 | 0.38947 | 0.0045 | 0.13581 | 0.00283 |  | 2120 | 21 | 2148 | 15 | 2174 | 37 |
| LX052-02 | 136.78 | 198.11 |  | 0.69 | 10.83084 | 0.14803 | 0.47657 | 0.00533 | 0.1648 | 0.00217 |  | 2512 | 23 | 2509 | 13 | 2506 | 10 |
| LX052-03 | 166.88 | 230.06 |  | 0.73 | 8.61308 | 0.11787 | 0.39687 | 0.00443 | 0.15737 | 0.00208 |  | 2155 | 20 | 2298 | 12 | 2428 | 11 |
| LX052-04 | 308.65 | 177.1 |  | 1.74 | 6.4055 | 0.0922 | 0.28605 | 0.00324 | 0.16238 | 0.00228 |  | 1622 | 16 | 2033 | 13 | 2481 | 11 |
| LX052-05 | 93.65 | 147.98 |  | 0.63 | 10.17106 | 0.14276 | 0.45102 | 0.00508 | 0.16353 | 0.00222 |  | 2400 | 23 | 2450 | 13 | 2492 | 11 |
| LX052-06 | 29.47 | 188.57 |  | 0.16 | 11.66485 | 0.16232 | 0.47692 | 0.00528 | 0.17739 | 0.00316 |  | 2514 | 23 | 2578 | 13 | 2629 | 30 |
| LX052-07 | 19.48 | 16.21 |  | 1.20 | 9.64066 | 0.19113 | 0.44404 | 0.00562 | 0.15744 | 0.00313 |  | 2369 | 25 | 2401 | 18 | 2428 | 17 |
| LX052-08 | 190.73 | 215.16 |  | 0.89 | 6.37804 | 0.09031 | 0.36982 | 0.00415 | 0.12506 | 0.00172 |  | 2029 | 20 | 2029 | 12 | 2030 | 12 |
| LX052-09 | 110.77 | 187.74 |  | 0.59 | 9.79919 | 0.13622 | 0.45554 | 0.00511 | 0.15599 | 0.0021 |  | 2420 | 23 | 2416 | 13 | 2413 | 11 |
| LX052-10 | 192.76 | 274.59 |  | 0.70 | 7.46505 | 0.10339 | 0.39504 | 0.00442 | 0.13703 | 0.00183 |  | 2146 | 20 | 2169 | 12 | 2190 | 11 |
| LX052-11 | 99.83 | 152.42 |  | 0.65 | 10.40425 | 0.14769 | 0.46696 | 0.00526 | 0.16157 | 0.00222 |  | 2470 | 23 | 2471 | 13 | 2472 | 11 |
| LX052-12 | 36.47 | 85.4 |  | 0.43 | 7.03083 | 0.10427 | 0.38842 | 0.00442 | 0.13126 | 0.0019 |  | 2115 | 21 | 2115 | 13 | 2115 | 12 |
| LX052-13 | 72.62 | 82.75 |  | 0.88 | 10.15682 | 0.14789 | 0.46336 | 0.00526 | 0.15895 | 0.00225 |  | 2454 | 23 | 2449 | 13 | 2445 | 11 |
| LX052-14 | 82.55 | 36.45 |  | 2.26 | 13.17271 | 0.1991 | 0.5186 | 0.00601 | 0.18419 | 0.00272 |  | 2693 | 26 | 2692 | 14 | 2691 | 12 |
| LX052-15 | 116.4 | 199.67 |  | 0.58 | 10.93518 | 0.15406 | 0.47527 | 0.00534 | 0.16684 | 0.00227 |  | 2507 | 23 | 2518 | 13 | 2526 | 11 |
| LX052-16 | 120.08 | 157.15 |  | 0.76 | 10.25586 | 0.14454 | 0.46419 | 0.00521 | 0.16021 | 0.00218 |  | 2458 | 23 | 2458 | 13 | 2458 | 11 |
| LX052-17 | 59.14 | 232.32 |  | 0.25 | 6.7007 | 0.10975 | 0.31726 | 0.00362 | 0.15318 | 0.00306 |  | 1776 | 18 | 2073 | 14 | 2382 | 35 |
| LX052-18 | 131.46 | 131.11 |  | 1.00 | 7.60182 | 0.11007 | 0.40311 | 0.00455 | 0.13674 | 0.00192 |  | 2183 | 21 | 2185 | 13 | 2186 | 12 |
| LX052-19 | 176.72 | 351.19 |  | 0.50 | 6.01037 | 0.11855 | 0.32517 | 0.00383 | 0.13406 | 0.00308 |  | 1815 | 19 | 1977 | 17 | 2152 | 41 |
| LX052-20 | 83.86 | 189.39 |  | 0.44 | 11.92368 | 0.19179 | 0.47991 | 0.00553 | 0.1802 | 0.00357 |  | 2527 | 24 | 2598 | 15 | 2655 | 34 |
| LX052-21 | 160.78 | 221.02 |  | 0.73 | 11.0346 | 0.15547 | 0.47991 | 0.00538 | 0.16673 | 0.00227 |  | 2527 | 23 | 2526 | 13 | 2525 | 11 |
| LX052-22 | 32.84 | 74.07 |  | 0.44 | 6.02204 | 0.11537 | 0.33029 | 0.0039 | 0.13224 | 0.00298 |  | 1840 | 19 | 1979 | 17 | 2128 | 40 |
| LX052-23 | 62.01 | 55.63 |  | 1.11 | 10.64994 | 0.162 | 0.47275 | 0.00544 | 0.16336 | 0.00243 |  | 2496 | 24 | 2493 | 14 | 2491 | 12 |
| LX052-24 | 139.86 | 427.71 |  | 0.33 | 4.34232 | 0.07858 | 0.2574 | 0.00296 | 0.12235 | 0.00262 |  | 1477 | 15 | 1701 | 15 | 1991 | 39 |
| LX052-25 | 213.02 | 165.85 |  | 1.28 | 5.15028 | 0.16091 | 0.33082 | 0.00434 | 0.11291 | 0.00383 |  | 1842 | 21 | 1844 | 27 | 1847 | 63 |
| LX052-26 | 186.42 | 517.86 |  | 0.36 | 3.02234 | 0.05491 | 0.21449 | 0.00245 | 0.1022 | 0.00219 |  | 1253 | 13 | 1413 | 14 | 1664 | 41 |
| LX052-27 | 124.95 | 327.81 |  | 0.38 | 8.5825 | 0.12183 | 0.40064 | 0.00449 | 0.15534 | 0.00213 |  | 2172 | 21 | 2295 | 13 | 2406 | 11 |
| LX052-28 | 54.15 | 282.8 |  | 0.19 | 7.78166 | 0.1114 | 0.39768 | 0.00447 | 0.14189 | 0.00197 |  | 2158 | 21 | 2206 | 13 | 2250 | 11 |
| LX052-29 | 134.37 | 326.57 |  | 0.41 | 9.98213 | 0.14207 | 0.45376 | 0.00509 | 0.15952 | 0.0022 |  | 2412 | 23 | 2433 | 13 | 2451 | 11 |
| LX052-30 | 142.01 | 330.1 |  | 0.43 | 6.20963 | 0.10973 | 0.32444 | 0.00376 | 0.13881 | 0.00293 |  | 1811 | 18 | 2006 | 15 | 2212 | 37 |
| LX052-31 | 97.15 | 431.78 |  | 0.22 | 10.99294 | 0.15572 | 0.40623 | 0.00455 | 0.19623 | 0.00269 |  | 2198 | 21 | 2523 | 13 | 2795 | 11 |
| LX052-32 | 173 | 767.58 |  | 0.23 | 2.11733 | 0.04356 | 0.16104 | 0.00185 | 0.09536 | 0.00225 |  | 963 | 10 | 1154 | 14 | 1535 | 45 |
| LX052-33 | 66.36 | 183.19 |  | 0.36 | 13.39469 | 0.19435 | 0.52123 | 0.00589 | 0.18635 | 0.00262 |  | 2704 | 25 | 2708 | 14 | 2710 | 11 |
| LX052-34 | 114.03 | 258.53 |  | 0.44 | 11.45068 | 0.16524 | 0.4865 | 0.00548 | 0.17067 | 0.00239 |  | 2556 | 24 | 2561 | 13 | 2564 | 11 |
| LX052-35 | 121.3 | 363.94 |  | 0.33 | 8.31647 | 0.11933 | 0.38606 | 0.00433 | 0.15621 | 0.00217 |  | 2105 | 20 | 2266 | 13 | 2415 | 11 |
| LX052-36 | 100.97 | 354.05 |  | 0.29 | 3.38964 | 0.06485 | 0.23675 | 0.00272 | 0.10384 | 0.00232 |  | 1370 | 14 | 1502 | 15 | 1694 | 42 |
| LX052-37 | 68.18 | 153.49 |  | 0.44 | 10.43316 | 0.15426 | 0.46705 | 0.0053 | 0.16198 | 0.00233 |  | 2471 | 23 | 2474 | 14 | 2476 | 12 |
| LX052-38 | 76.01 | 92.5 |  | 0.82 | 7.48561 | 0.11621 | 0.39851 | 0.00457 | 0.13621 | 0.00207 |  | 2162 | 21 | 2171 | 14 | 2180 | 13 |
| LX052-39 | 56.72 | 221.12 |  | 0.26 | 3.24086 | 0.06643 | 0.21401 | 0.00249 | 0.10983 | 0.00259 |  | 1250 | 13 | 1467 | 16 | 1797 | 44 |
| LX052-40 | 138 | 196.28 |  | 0.70 | 9.79713 | 0.14292 | 0.44149 | 0.00498 | 0.16092 | 0.00228 |  | 2357 | 22 | 2416 | 13 | 2465 | 11 |
| LX052-41 | 96.44 | 153.01 |  | 0.63 | 7.4277 | 0.14573 | 0.34927 | 0.0042 | 0.15424 | 0.00355 |  | 1931 | 20 | 2164 | 18 | 2393 | 40 |
| LX052-42 | 332.69 | 385.27 |  | 0.86 | 5.42465 | 0.12235 | 0.28479 | 0.0035 | 0.13815 | 0.00355 |  | 1615 | 18 | 1889 | 19 | 2204 | 46 |
| LX052-43 | 137.85 | 239.96 |  | 0.57 | 8.24025 | 0.1571 | 0.37903 | 0.0045 | 0.15768 | 0.00354 |  | 2072 | 21 | 2258 | 17 | 2431 | 39 |
| LX052-44 | 77.48 | 52.48 |  | 1.48 | 6.33101 | 0.1063 | 0.36789 | 0.0043 | 0.12479 | 0.00207 |  | 2019 | 20 | 2023 | 15 | 2026 | 15 |
| LX052-45 | 275.79 | 264.12 |  | 1.04 | 5.76214 | 0.08515 | 0.28471 | 0.00321 | 0.14676 | 0.00211 |  | 1615 | 16 | 1941 | 13 | 2309 | 12 |
| LX052-46 | 163.87 | 132.07 |  | 1.24 | 6.31978 | 0.09829 | 0.36923 | 0.00422 | 0.12411 | 0.00189 |  | 2026 | 20 | 2021 | 14 | 2016 | 13 |
| LX052-47 | 120.41 | 198.47 |  | 0.61 | 7.42146 | 0.11134 | 0.39731 | 0.0045 | 0.13545 | 0.00198 |  | 2157 | 21 | 2164 | 13 | 2170 | 12 |
| LX052-48 | 196.85 | 302.41 |  | 0.65 | 10.11384 | 0.14879 | 0.46282 | 0.00522 | 0.15846 | 0.00226 |  | 2452 | 23 | 2445 | 14 | 2439 | 12 |
| LX052-49 | 101.56 | 163.45 |  | 0.62 | 8.54029 | 0.16789 | 0.36541 | 0.00441 | 0.16951 | 0.00391 |  | 2008 | 21 | 2290 | 18 | 2553 | 40 |
| LX052-50 | 29.79 | 103.38 |  | 0.29 | 9.77491 | 0.15177 | 0.45202 | 0.00519 | 0.15681 | 0.00238 |  | 2404 | 23 | 2414 | 14 | 2422 | 13 |
| LX052-51 | 137.5 | 214.48 |  | 0.64 | 8.42492 | 0.17557 | 0.40215 | 0.00487 | 0.15194 | 0.00366 |  | 2179 | 22 | 2278 | 19 | 2368 | 42 |
| LX052-52 | 90.56 | 269.78 |  | 0.34 | 6.06762 | 0.09128 | 0.36109 | 0.00408 | 0.12185 | 0.00178 |  | 1987 | 19 | 1986 | 13 | 1983 | 13 |
| LX052-53 | 148.31 | 211.75 |  | 0.70 | 7.15578 | 0.15403 | 0.36789 | 0.00447 | 0.14107 | 0.00349 |  | 2019 | 21 | 2131 | 19 | 2240 | 44 |
| LX052-54 | 108.5 | 253.84 |  | 0.43 | 9.14082 | 0.15769 | 0.38306 | 0.00446 | 0.17307 | 0.0036 |  | 2091 | 21 | 2352 | 16 | 2588 | 36 |
| LX052-55 | 59.98 | 73.47 |  | 0.82 | 8.6794 | 0.14637 | 0.43119 | 0.00507 | 0.14596 | 0.00243 |  | 2311 | 23 | 2305 | 15 | 2299 | 14 |
| LX052-56 | 68.65 | 99.26 |  | 0.69 | 10.9479 | 0.17035 | 0.47618 | 0.00546 | 0.16672 | 0.00253 |  | 2511 | 24 | 2519 | 14 | 2525 | 12 |
| LX052-57 | 54.51 | 124.71 |  | 0.44 | 7.04688 | 0.11176 | 0.38768 | 0.00445 | 0.13181 | 0.00205 |  | 2112 | 21 | 2117 | 14 | 2122 | 13 |
| LX052-58 | 148.54 | 243.44 |  | 0.61 | 8.22011 | 0.12418 | 0.39018 | 0.00442 | 0.15277 | 0.00224 |  | 2124 | 20 | 2256 | 14 | 2377 | 12 |
| LX052-59 | 163.52 | 136.58 |  | 1.20 | 8.09881 | 0.13067 | 0.4167 | 0.00481 | 0.14093 | 0.00223 |  | 2245 | 22 | 2242 | 15 | 2239 | 14 |
| LX052-60 | 421.39 | 259.76 |  | 1.62 | 7.48174 | 0.25466 | 0.38559 | 0.00539 | 0.14073 | 0.00518 |  | 2102 | 25 | 2171 | 30 | 2236 | 65 |
| LX052-61 | 118.84 | 205.26 |  | 0.58 | 5.96488 | 0.12567 | 0.35076 | 0.00419 | 0.12334 | 0.00299 |  | 1938 | 20 | 1971 | 18 | 2005 | 44 |
| LX052-62 | 162.21 | 279.71 |  | 0.58 | 8.36894 | 0.1302 | 0.38636 | 0.00441 | 0.15707 | 0.00239 |  | 2106 | 21 | 2272 | 14 | 2424 | 13 |
| LX052-63 | 110.08 | 122.39 |  | 0.90 | 6.50534 | 0.10378 | 0.37432 | 0.00429 | 0.12602 | 0.00197 |  | 2050 | 20 | 2047 | 14 | 2043 | 14 |
| LX052-64 | 176.81 | 563.99 |  | 0.31 | 3.35073 | 0.06324 | 0.22595 | 0.0026 | 0.10755 | 0.00238 |  | 1313 | 14 | 1493 | 15 | 1758 | 41 |
| LX052-65 | 57.82 | 333.27 |  | 0.17 | 3.00651 | 0.05705 | 0.21225 | 0.00243 | 0.10273 | 0.00228 |  | 1241 | 13 | 1409 | 14 | 1674 | 42 |
| LX052-66 | 108.15 | 77.72 |  | 1.39 | 10.0365 | 0.16439 | 0.45732 | 0.00533 | 0.15914 | 0.00256 |  | 2428 | 24 | 2438 | 15 | 2447 | 13 |
| LX052-67 | 195.56 | 266.26 |  | 0.73 | 6.05805 | 0.09517 | 0.35946 | 0.0041 | 0.12221 | 0.00187 |  | 1980 | 19 | 1984 | 14 | 1989 | 13 |
| LX052-68 | 236.61 | 465.64 |  | 0.51 | 3.43758 | 0.07678 | 0.22865 | 0.00272 | 0.10904 | 0.00276 |  | 1327 | 14 | 1513 | 18 | 1783 | 47 |
| LX052-69 | 121.76 | 100.04 |  | 1.22 | 8.65513 | 0.25597 | 0.41898 | 0.00566 | 0.14982 | 0.00487 |  | 2256 | 26 | 2302 | 27 | 2344 | 57 |
| LX052-70 | 41.48 | 84.11 |  | 0.49 | 25.10415 | 0.39287 | 0.67367 | 0.00776 | 0.27022 | 0.00413 |  | 3320 | 30 | 3312 | 15 | 3307 | 12 |
| LX052-71 | 251.81 | 349.28 |  | 0.72 | 5.49087 | 0.1294 | 0.29869 | 0.00368 | 0.13333 | 0.00355 |  | 1685 | 18 | 1899 | 20 | 2142 | 48 |
| LX052-72 | 125.74 | 174.47 |  | 0.72 | 6.34911 | 0.10193 | 0.36814 | 0.00422 | 0.12506 | 0.00196 |  | 2021 | 20 | 2025 | 14 | 2030 | 14 |
| LX052-73 | 52.37 | 54.71 |  | 0.96 | 9.59907 | 0.23738 | 0.43522 | 0.00566 | 0.15996 | 0.00447 |  | 2329 | 25 | 2397 | 23 | 2455 | 48 |
| LX052-74 | 161.77 | 136.39 |  | 1.19 | 7.94364 | 0.12931 | 0.40759 | 0.0047 | 0.14132 | 0.00225 |  | 2204 | 22 | 2225 | 15 | 2243 | 14 |
| LX052-75 | 223.01 | 367.48 |  | 0.61 | 5.22799 | 0.12292 | 0.30851 | 0.00375 | 0.1229 | 0.00325 |  | 1733 | 18 | 1857 | 20 | 1999 | 48 |
| LX052-76 | 33.79 | 43.56 |  | 0.78 | 7.02836 | 0.18386 | 0.358 | 0.00463 | 0.14239 | 0.00416 |  | 1973 | 22 | 2115 | 23 | 2256 | 52 |
| LX052-77 | 49.03 | 88.15 |  | 0.56 | 12.41682 | 0.20153 | 0.50512 | 0.00585 | 0.17825 | 0.00283 |  | 2636 | 25 | 2636 | 15 | 2637 | 13 |
| LX052-78 | 63.12 | 83.86 |  | 0.75 | 9.11086 | 0.15929 | 0.43844 | 0.0052 | 0.15068 | 0.0026 |  | 2344 | 23 | 2349 | 16 | 2354 | 15 |
| LX052-79 | 66.07 | 79.92 |  | 0.83 | 9.44908 | 0.15862 | 0.41517 | 0.00486 | 0.16504 | 0.00273 |  | 2239 | 22 | 2383 | 15 | 2508 | 14 |
| LX052-80 | 51.95 | 57.75 |  | 0.90 | 7.86657 | 0.1392 | 0.40976 | 0.00487 | 0.13921 | 0.00244 |  | 2214 | 22 | 2216 | 16 | 2217 | 15 |
| LX052-81 | 117.18 | 216.68 |  | 0.54 | 6.05431 | 0.09828 | 0.33423 | 0.00384 | 0.13135 | 0.00209 |  | 1859 | 19 | 1984 | 14 | 2116 | 14 |
| LX052-82 | 129.32 | 144.58 |  | 0.89 | 7.9138 | 0.20678 | 0.38663 | 0.00496 | 0.14845 | 0.00432 |  | 2107 | 23 | 2221 | 24 | 2328 | 51 |
| LX052-83 | 147.36 | 194.24 |  | 0.76 | 7.4673 | 0.12091 | 0.40068 | 0.0046 | 0.13514 | 0.00214 |  | 2172 | 21 | 2169 | 14 | 2166 | 14 |
| LX052-84 | 53.99 | 95.71 |  | 0.56 | 11.00567 | 0.18349 | 0.47788 | 0.00557 | 0.167 | 0.00273 |  | 2518 | 24 | 2524 | 16 | 2528 | 14 |
| LX052-85 | 207.27 | 182.68 |  | 1.13 | 10.7194 | 0.17268 | 0.47367 | 0.00543 | 0.1641 | 0.00258 |  | 2500 | 24 | 2499 | 15 | 2498 | 13 |
| LX052-86 | 74.61 | 117.18 |  | 0.64 | 10.44076 | 0.17268 | 0.46086 | 0.00534 | 0.16428 | 0.00267 |  | 2443 | 24 | 2475 | 15 | 2500 | 14 |
| LX052-87 | 155.36 | 387.54 |  | 0.40 | 8.14124 | 0.14925 | 0.36586 | 0.00428 | 0.16139 | 0.00351 |  | 2010 | 20 | 2247 | 17 | 2470 | 38 |
| LX052-88 | 52.06 | 143.39 |  | 0.36 | 13.22044 | 0.21495 | 0.51897 | 0.00598 | 0.18472 | 0.00294 |  | 2695 | 25 | 2696 | 15 | 2696 | 13 |
| LX052-89 | 109.14 | 220.08 |  | 0.50 | 9.0169 | 0.17862 | 0.42752 | 0.0051 | 0.15297 | 0.00354 |  | 2295 | 23 | 2340 | 18 | 2379 | 40 |
| LX052-90 | 47.68 | 79.17 |  | 0.60 | 10.7431 | 0.18064 | 0.47388 | 0.00552 | 0.16439 | 0.00272 |  | 2501 | 24 | 2501 | 16 | 2501 | 14 |
| LX052-91 | 89.85 | 106.94 |  | 0.84 | 7.33207 | 0.12552 | 0.39615 | 0.00462 | 0.13421 | 0.00226 |  | 2151 | 21 | 2153 | 15 | 2154 | 15 |
| LX052-92 | 38.21 | 60.52 |  | 0.63 | 8.14879 | 0.18737 | 0.40585 | 0.00508 | 0.14562 | 0.00381 |  | 2196 | 23 | 2248 | 21 | 2295 | 46 |
| LX052-93 | 69.53 | 119.09 |  | 0.58 | 7.39673 | 0.12487 | 0.40046 | 0.00464 | 0.13393 | 0.00222 |  | 2171 | 21 | 2161 | 15 | 2150 | 15 |
| LX052-94 | 85.65 | 63.47 |  | 1.35 | 10.09642 | 0.17424 | 0.45984 | 0.0054 | 0.15921 | 0.00271 |  | 2439 | 24 | 2444 | 16 | 2447 | 15 |
| LX052-95 | 73.9 | 226.39 |  | 0.33 | 13.43808 | 0.2189 | 0.52468 | 0.00602 | 0.18572 | 0.00296 |  | 2719 | 25 | 2711 | 15 | 2705 | 13 |
| LX052-96 | 28.8 | 62.83 |  | 0.46 | 9.58503 | 0.18906 | 0.43811 | 0.00527 | 0.15868 | 0.00367 |  | 2342 | 24 | 2396 | 18 | 2442 | 40 |
| LX052-97 | 69.75 | 122.02 |  | 0.57 | 7.83662 | 0.16587 | 0.38728 | 0.00469 | 0.14676 | 0.00358 |  | 2110 | 22 | 2212 | 19 | 2308 | 43 |
| LX052-98 | 47.92 | 120.33 |  | 0.40 | 9.30804 | 0.17966 | 0.4266 | 0.00508 | 0.15825 | 0.00359 |  | 2290 | 23 | 2369 | 18 | 2437 | 39 |
| LX052-99 | 65.04 | 75.95 |  | 0.86 | 6.59274 | 0.11895 | 0.37511 | 0.00444 | 0.12744 | 0.00227 |  | 2053 | 21 | 2058 | 16 | 2063 | 16 |
| LX06-3 (leptynite) | | | | | | | | | | | | | | | | | |
| LX063-01 | 26.42 | 68.8 |  | 0.38 | 15.66963 | 0.25061 | 0.55712 | 0.00846 | 0.20419 | 0.00267 |  | 2855 | 35 | 2857 | 15 | 2860 | 21 |
| LX063-02 | 104.65 | 277.72 |  | 0.38 | 6.66725 | 0.10124 | 0.37475 | 0.0054 | 0.12916 | 0.00156 |  | 2052 | 25 | 2068 | 13 | 2087 | 21 |
| LX063-03 | 229.38 | 526.13 |  | 0.44 | 4.89618 | 0.07107 | 0.32298 | 0.00457 | 0.11005 | 0.00123 |  | 1804 | 22 | 1802 | 12 | 1800 | 20 |
| LX063-04 | 89.56 | 172.6 |  | 0.52 | 10.89134 | 0.17191 | 0.4744 | 0.00706 | 0.16667 | 0.00215 |  | 2503 | 31 | 2514 | 15 | 2525 | 21 |
| LX063-05 | 136.71 | 238.86 |  | 0.57 | 11.19431 | 0.16053 | 0.48419 | 0.00688 | 0.16784 | 0.00183 |  | 2546 | 30 | 2539 | 13 | 2536 | 18 |
| LX063-06 | 158.46 | 95.94 |  | 1.65 | 10.71189 | 0.18403 | 0.4737 | 0.00737 | 0.16416 | 0.00241 |  | 2500 | 32 | 2499 | 16 | 2499 | 25 |
| LX063-07 | 29 | 81.02 |  | 0.36 | 12.90924 | 0.19651 | 0.51348 | 0.00754 | 0.18251 | 0.00221 |  | 2672 | 32 | 2673 | 14 | 2676 | 20 |
| LX063-08 | 207.13 | 333.46 |  | 0.62 | 9.90571 | 0.14034 | 0.44543 | 0.00629 | 0.16144 | 0.00172 |  | 2375 | 28 | 2426 | 13 | 2471 | 18 |
| LX063-09 | 145.41 | 380.46 |  | 0.38 | 10.7051 | 0.15063 | 0.47555 | 0.00669 | 0.16342 | 0.00172 |  | 2508 | 29 | 2498 | 13 | 2491 | 18 |
| LX063-10 | 131.27 | 237.04 |  | 0.55 | 10.78216 | 0.15394 | 0.4756 | 0.00674 | 0.16458 | 0.00178 |  | 2508 | 29 | 2505 | 13 | 2503 | 18 |
| LX063-11 | 135.95 | 242.41 |  | 0.56 | 10.64125 | 0.15314 | 0.47235 | 0.00672 | 0.16354 | 0.00179 |  | 2494 | 29 | 2492 | 13 | 2493 | 18 |
| LX063-12 | 158.24 | 115.58 |  | 1.37 | 5.11657 | 0.08163 | 0.32985 | 0.00481 | 0.11261 | 0.00148 |  | 1838 | 23 | 1839 | 14 | 1842 | 24 |
| LX063-13 | 37.78 | 87.26 |  | 0.43 | 14.65786 | 0.23847 | 0.54195 | 0.0083 | 0.19634 | 0.00264 |  | 2792 | 35 | 2793 | 15 | 2796 | 22 |
| LX063-14 | 81.68 | 88.26 |  | 0.93 | 12.83982 | 0.21135 | 0.51124 | 0.00782 | 0.18232 | 0.0025 |  | 2662 | 33 | 2668 | 16 | 2674 | 23 |
| LX063-15 | 160.01 | 218.37 |  | 0.73 | 11.40199 | 0.16553 | 0.4862 | 0.00695 | 0.17024 | 0.0019 |  | 2554 | 30 | 2557 | 14 | 2560 | 19 |
| LX063-16 | 217.86 | 437.54 |  | 0.50 | 12.16968 | 0.16939 | 0.46001 | 0.00645 | 0.19205 | 0.00198 |  | 2440 | 28 | 2618 | 13 | 2760 | 17 |
| LX063-17 | 141.32 | 221.16 |  | 0.64 | 10.18816 | 0.14616 | 0.46196 | 0.00655 | 0.1601 | 0.00175 |  | 2448 | 29 | 2452 | 13 | 2457 | 18 |
| LX063-19 | 100.93 | 159.92 |  | 0.63 | 4.96385 | 0.07749 | 0.32428 | 0.00469 | 0.11112 | 0.00141 |  | 1811 | 23 | 1813 | 13 | 1818 | 23 |
| LX063-20 | 37.19 | 54.91 |  | 0.68 | 10.02849 | 0.19456 | 0.45901 | 0.0076 | 0.1586 | 0.00277 |  | 2435 | 34 | 2437 | 18 | 2441 | 29 |
| LX063-21 | 16.22 | 33.4 |  | 0.49 | 15.93576 | 0.27872 | 0.56324 | 0.00903 | 0.20539 | 0.00308 |  | 2880 | 37 | 2873 | 17 | 2870 | 24 |
| LX063-22 | 1.84 | 113.53 |  | 0.02 | 11.79723 | 0.18514 | 0.49302 | 0.00732 | 0.1737 | 0.00221 |  | 2584 | 32 | 2588 | 15 | 2594 | 21 |
| LX063-23 | 121.47 | 92.9 |  | 1.31 | 5.0543 | 0.0878 | 0.32516 | 0.00487 | 0.11284 | 0.00169 |  | 1815 | 24 | 1829 | 15 | 1846 | 27 |
| LX063-24 | 57.16 | 77.04 |  | 0.74 | 11.26104 | 0.19021 | 0.48312 | 0.00722 | 0.16921 | 0.00241 |  | 2541 | 31 | 2545 | 16 | 2550 | 24 |
| LX063-25 | 51.57 | 129.16 |  | 0.40 | 12.12281 | 0.18849 | 0.49786 | 0.00735 | 0.17676 | 0.00222 |  | 2605 | 32 | 2614 | 15 | 2623 | 21 |
| LX063-26 | 159.49 | 250.87 |  | 0.64 | 15.36745 | 0.21906 | 0.55288 | 0.00786 | 0.20177 | 0.00217 |  | 2837 | 33 | 2838 | 14 | 2841 | 17 |
| LX063-27 | 241.85 | 304.75 |  | 0.79 | 14.81541 | 0.22019 | 0.54478 | 0.00793 | 0.19741 | 0.00229 |  | 2803 | 33 | 2804 | 14 | 2805 | 19 |
| LX063-28 | 95.27 | 132.88 |  | 0.72 | 9.46927 | 0.14471 | 0.44703 | 0.00651 | 0.15377 | 0.00188 |  | 2382 | 29 | 2385 | 14 | 2388 | 21 |
| LX063-29 | 176.06 | 258.56 |  | 0.68 | 10.54271 | 0.15257 | 0.46927 | 0.00669 | 0.16308 | 0.00181 |  | 2480 | 29 | 2484 | 13 | 2488 | 19 |
| LX063-30 | 93.77 | 81.41 |  | 1.15 | 9.20634 | 0.16243 | 0.43848 | 0.00684 | 0.15241 | 0.00233 |  | 2344 | 31 | 2359 | 16 | 2373 | 26 |
| LX063-31 | 94.96 | 172.71 |  | 0.55 | 12.15228 | 0.17449 | 0.45881 | 0.00654 | 0.19227 | 0.0021 |  | 2434 | 29 | 2616 | 13 | 2762 | 18 |
| LX063-32 | 19.41 | 45.1 |  | 0.43 | 11.07721 | 0.19552 | 0.47633 | 0.00744 | 0.16881 | 0.00258 |  | 2511 | 32 | 2530 | 16 | 2546 | 25 |
| LX063-33 | 32.02 | 54.6 |  | 0.59 | 8.36663 | 0.15285 | 0.42035 | 0.0066 | 0.14448 | 0.00232 |  | 2262 | 30 | 2272 | 17 | 2282 | 27 |
| LX063-34 | 64.63 | 253.78 |  | 0.25 | 10.74341 | 0.16832 | 0.47464 | 0.00703 | 0.16431 | 0.00209 |  | 2504 | 31 | 2501 | 15 | 2501 | 21 |
| LX063-35 | 195.44 | 495.77 |  | 0.39 | 7.32075 | 0.10776 | 0.39487 | 0.00564 | 0.13458 | 0.00154 |  | 2145 | 26 | 2151 | 13 | 2159 | 20 |
| LX063-36 | 392.25 | 876.7 |  | 0.45 | 6.52783 | 0.09046 | 0.32082 | 0.00448 | 0.1477 | 0.00151 |  | 1794 | 22 | 2050 | 12 | 2319 | 17 |
| LX063-37 | 103.86 | 206.59 |  | 0.50 | 15.56303 | 0.23092 | 0.55504 | 0.00807 | 0.20354 | 0.00235 |  | 2846 | 33 | 2850 | 14 | 2855 | 19 |
| LX063-38 | 157.36 | 246.01 |  | 0.64 | 14.71954 | 0.21534 | 0.54314 | 0.00783 | 0.19672 | 0.00222 |  | 2797 | 33 | 2797 | 14 | 2799 | 18 |
| LX063-39 | 140.96 | 151.74 |  | 0.93 | 10.66194 | 0.16257 | 0.47364 | 0.00692 | 0.1634 | 0.00199 |  | 2500 | 30 | 2494 | 14 | 2491 | 20 |
| LX063-40 | 99.68 | 175.73 |  | 0.57 | 10.78907 | 0.16513 | 0.47474 | 0.00695 | 0.16497 | 0.00202 |  | 2504 | 30 | 2505 | 14 | 2507 | 20 |
| LX063-41 | 58.71 | 102.88 |  | 0.57 | 10.7453 | 0.17247 | 0.47401 | 0.0071 | 0.16455 | 0.00218 |  | 2501 | 31 | 2501 | 15 | 2503 | 22 |
| LX063-42 | 92.07 | 106.84 |  | 0.86 | 17.76537 | 0.2628 | 0.58784 | 0.00856 | 0.21937 | 0.00252 |  | 2981 | 35 | 2977 | 14 | 2976 | 18 |
| LX063-43 | 102.01 | 156.28 |  | 0.65 | 14.53439 | 0.21337 | 0.52685 | 0.00761 | 0.20025 | 0.00227 |  | 2728 | 32 | 2785 | 14 | 2828 | 18 |
| LX063-44 | 96.75 | 382.28 |  | 0.25 | 5.74884 | 0.08458 | 0.34536 | 0.00492 | 0.12083 | 0.00138 |  | 1912 | 24 | 1939 | 13 | 1969 | 20 |
| LX063-45 | 6.28 | 17.82 |  | 0.35 | 11.3681 | 0.32935 | 0.47424 | 0.01027 | 0.174 | 0.00494 |  | 2502 | 45 | 2554 | 27 | 2597 | 47 |
| LX063-46 | 124.7 | 290.22 |  | 0.43 | 10.03551 | 0.1454 | 0.45808 | 0.00653 | 0.15902 | 0.00177 |  | 2431 | 29 | 2438 | 13 | 2445 | 19 |
| LX063-47 | 70.46 | 174.89 |  | 0.40 | 13.98242 | 0.21858 | 0.52964 | 0.00792 | 0.19163 | 0.00242 |  | 2740 | 33 | 2749 | 15 | 2756 | 21 |
| LX063-48 | 161.83 | 582.53 |  | 0.28 | 5.00546 | 0.07682 | 0.32644 | 0.0047 | 0.1113 | 0.00137 |  | 1821 | 23 | 1820 | 13 | 1821 | 22 |
| LX063-49 | 293.74 | 484.68 |  | 0.61 | 13.31732 | 0.18854 | 0.52072 | 0.00737 | 0.18563 | 0.00197 |  | 2702 | 31 | 2702 | 13 | 2704 | 17 |
| LX063-50 | 65.92 | 125.22 |  | 0.53 | 11.22623 | 0.17171 | 0.48247 | 0.00707 | 0.16889 | 0.00206 |  | 2538 | 31 | 2542 | 14 | 2547 | 20 |
| LX063-51 | 93.04 | 80.02 |  | 1.16 | 10.89405 | 0.17567 | 0.47834 | 0.00718 | 0.16531 | 0.0022 |  | 2520 | 31 | 2514 | 15 | 2511 | 22 |
| LX063-52 | 111.11 | 219.81 |  | 0.51 | 15.45228 | 0.23141 | 0.55499 | 0.00812 | 0.2021 | 0.00237 |  | 2846 | 34 | 2844 | 14 | 2843 | 19 |
| LX063-53 | 112.66 | 200.39 |  | 0.56 | 10.76352 | 0.16131 | 0.47508 | 0.00689 | 0.16445 | 0.00194 |  | 2506 | 30 | 2503 | 14 | 2502 | 20 |
| LX063-54 | 38.65 | 77.44 |  | 0.50 | 12.30863 | 0.20862 | 0.50376 | 0.00781 | 0.17735 | 0.00255 |  | 2630 | 33 | 2628 | 16 | 2628 | 24 |
| LX063-55 | 85.88 | 133.45 |  | 0.64 | 9.22179 | 0.13663 | 0.4093 | 0.00589 | 0.16354 | 0.0019 |  | 2212 | 27 | 2360 | 14 | 2493 | 19 |
| LX063-56 | 50.9 | 85.06 |  | 0.60 | 10.3855 | 0.17239 | 0.46618 | 0.0071 | 0.1617 | 0.00226 |  | 2467 | 31 | 2470 | 15 | 2474 | 23 |
| LX063-57 | 249.87 | 208.34 |  | 1.20 | 9.90516 | 0.14771 | 0.45606 | 0.00658 | 0.15764 | 0.00184 |  | 2422 | 29 | 2426 | 14 | 2431 | 20 |
| LX063-58 | 174.08 | 249.34 |  | 0.70 | 10.91378 | 0.16271 | 0.4776 | 0.00691 | 0.16586 | 0.00194 |  | 2517 | 30 | 2516 | 14 | 2516 | 20 |
| LX063-59 | 127.35 | 222.42 |  | 0.57 | 15.41121 | 0.23754 | 0.55465 | 0.00825 | 0.20168 | 0.00249 |  | 2845 | 34 | 2841 | 15 | 2840 | 20 |
| LX063-60 | 64.32 | 205.22 |  | 0.31 | 7.63145 | 0.11766 | 0.40242 | 0.00586 | 0.13765 | 0.00171 |  | 2180 | 27 | 2189 | 14 | 2198 | 21 |
| LX063-61 | 113.95 | 323.81 |  | 0.35 | 8.80353 | 0.12539 | 0.41089 | 0.00581 | 0.15551 | 0.00167 |  | 2219 | 27 | 2318 | 13 | 2407 | 18 |
| LX063-62 | 337.23 | 359.77 |  | 0.94 | 9.85053 | 0.14381 | 0.45608 | 0.00652 | 0.15677 | 0.00176 |  | 2422 | 29 | 2421 | 13 | 2421 | 19 |
| LX063-63 | 54.1 | 134.77 |  | 0.40 | 12.52346 | 0.18793 | 0.47742 | 0.00696 | 0.19039 | 0.00225 |  | 2516 | 30 | 2645 | 14 | 2746 | 19 |
| LX063-64 | 59.65 | 99.7 |  | 0.60 | 10.39361 | 0.15931 | 0.46676 | 0.00683 | 0.16162 | 0.00198 |  | 2469 | 30 | 2471 | 14 | 2473 | 21 |
| LX063-65 | 47.21 | 149.9 |  | 0.31 | 9.64417 | 0.14742 | 0.45134 | 0.00657 | 0.15509 | 0.00189 |  | 2401 | 29 | 2401 | 14 | 2403 | 21 |
| LX063-66 | 48.99 | 97.12 |  | 0.50 | 14.30296 | 0.24021 | 0.53475 | 0.00834 | 0.19413 | 0.00274 |  | 2761 | 35 | 2770 | 16 | 2778 | 23 |
| LX063-67 | 62.33 | 444.51 |  | 0.14 | 5.58322 | 0.07972 | 0.33025 | 0.00465 | 0.12271 | 0.00133 |  | 1840 | 23 | 1914 | 12 | 1996 | 19 |
| LX063-68 | 55.63 | 81.44 |  | 0.68 | 10.71709 | 0.17616 | 0.47556 | 0.0072 | 0.16357 | 0.00224 |  | 2508 | 31 | 2499 | 15 | 2493 | 23 |
| LX063-69 | 128.03 | 104.66 |  | 1.22 | 10.85731 | 0.17714 | 0.47427 | 0.00718 | 0.16615 | 0.00226 |  | 2502 | 31 | 2511 | 15 | 2519 | 23 |
| LX063-70 | 3.11 | 82.59 |  | 0.04 | 10.35657 | 0.16745 | 0.46638 | 0.007 | 0.16118 | 0.00216 |  | 2468 | 31 | 2467 | 15 | 2468 | 22 |
| LX063-71 | 91.88 | 142.27 |  | 0.65 | 11.6604 | 0.17645 | 0.48671 | 0.00707 | 0.17389 | 0.00208 |  | 2556 | 31 | 2578 | 14 | 2595 | 20 |
| LX063-72 | 159.97 | 182.14 |  | 0.88 | 10.69009 | 0.1615 | 0.46965 | 0.00683 | 0.16521 | 0.00198 |  | 2482 | 30 | 2497 | 14 | 2510 | 20 |
| LX063-73 | 202.89 | 124.11 |  | 1.63 | 9.96836 | 0.15301 | 0.45868 | 0.00671 | 0.15773 | 0.00194 |  | 2434 | 30 | 2432 | 14 | 2432 | 21 |
| LX063-74 | 40.49 | 68.6 |  | 0.59 | 11.09044 | 0.18295 | 0.47948 | 0.00728 | 0.16788 | 0.00232 |  | 2525 | 32 | 2531 | 15 | 2537 | 23 |
| LX063-75 | 13.57 | 39.83 |  | 0.34 | 10.65927 | 0.20928 | 0.47273 | 0.00786 | 0.16365 | 0.0029 |  | 2496 | 34 | 2494 | 18 | 2494 | 30 |
| LX063-76 | 101.1 | 194.97 |  | 0.52 | 10.42055 | 0.15341 | 0.4687 | 0.00673 | 0.16136 | 0.00184 |  | 2478 | 30 | 2473 | 14 | 2470 | 19 |
| LX063-77 | 97.69 | 86.34 |  | 1.13 | 5.25787 | 0.09843 | 0.33512 | 0.00516 | 0.11387 | 0.0019 |  | 1863 | 25 | 1862 | 16 | 1862 | 30 |
| LX063-78 | 204.77 | 291.92 |  | 0.70 | 8.91357 | 0.12671 | 0.40539 | 0.00572 | 0.15958 | 0.00171 |  | 2194 | 26 | 2329 | 13 | 2451 | 18 |
| LX063-79 | 19.99 | 58.54 |  | 0.34 | 12.47988 | 0.2107 | 0.50776 | 0.00788 | 0.17838 | 0.00255 |  | 2647 | 34 | 2641 | 16 | 2638 | 24 |
| LX063-80 | 176.06 | 310.83 |  | 0.57 | 11.9787 | 0.17265 | 0.45287 | 0.00646 | 0.19197 | 0.00211 |  | 2408 | 29 | 2603 | 14 | 2759 | 18 |
| LX063-81 | 34.46 | 78.8 |  | 0.44 | 12.50716 | 0.20798 | 0.5077 | 0.0078 | 0.17879 | 0.00249 |  | 2647 | 33 | 2643 | 16 | 2642 | 23 |
| LX063-82 | 50.05 | 76.87 |  | 0.65 | 9.20035 | 0.16486 | 0.4406 | 0.00688 | 0.15155 | 0.00237 |  | 2353 | 31 | 2358 | 16 | 2364 | 26 |
| LX063-83 | 298.15 | 365.9 |  | 0.81 | 10.70544 | 0.15592 | 0.47305 | 0.00676 | 0.16425 | 0.00184 |  | 2497 | 30 | 2498 | 14 | 2500 | 19 |
| LX063-84 | 290.27 | 431.75 |  | 0.67 | 14.97755 | 0.20973 | 0.54348 | 0.00765 | 0.20001 | 0.00208 |  | 2798 | 32 | 2814 | 13 | 2826 | 17 |
| LX063-85 | 165.98 | 307.84 |  | 0.54 | 14.74721 | 0.21024 | 0.54409 | 0.00773 | 0.19671 | 0.00211 |  | 2801 | 32 | 2799 | 14 | 2799 | 17 |
| LX063-86 | 90.31 | 108.08 |  | 0.84 | 11.98493 | 0.17956 | 0.49712 | 0.00722 | 0.17497 | 0.00206 |  | 2601 | 31 | 2603 | 14 | 2606 | 19 |
| LX063-87 | 172.2 | 217.37 |  | 0.79 | 15.506 | 0.23246 | 0.55463 | 0.00811 | 0.2029 | 0.00239 |  | 2844 | 34 | 2847 | 14 | 2850 | 19 |
| LX063-88 | 177.58 | 105.22 |  | 1.69 | 5.29777 | 0.08942 | 0.33534 | 0.005 | 0.11466 | 0.00165 |  | 1864 | 24 | 1869 | 14 | 1875 | 26 |
| LX063-89 | 105.27 | 200.86 |  | 0.52 | 12.85594 | 0.18377 | 0.48875 | 0.00694 | 0.1909 | 0.00206 |  | 2565 | 30 | 2669 | 13 | 2750 | 18 |
| LX063-90 | 225.62 | 293.9 |  | 0.77 | 10.58745 | 0.15 | 0.47068 | 0.00664 | 0.16325 | 0.00174 |  | 2487 | 29 | 2488 | 13 | 2490 | 18 |
| LX063-91 | 161.94 | 237.1 |  | 0.68 | 14.82244 | 0.21501 | 0.54481 | 0.00782 | 0.19745 | 0.00219 |  | 2804 | 33 | 2804 | 14 | 2805 | 18 |
| LX063-92 | 332.75 | 320.57 |  | 1.04 | 7.13177 | 0.10295 | 0.39008 | 0.00553 | 0.13269 | 0.00146 |  | 2123 | 26 | 2128 | 13 | 2134 | 19 |
| LX063-93 | 108.91 | 177.6 |  | 0.61 | 13.14697 | 0.18897 | 0.51813 | 0.00738 | 0.18415 | 0.00201 |  | 2691 | 31 | 2690 | 14 | 2691 | 18 |
| LX063-94 | 114.28 | 290.36 |  | 0.39 | 14.93137 | 0.21261 | 0.54674 | 0.00776 | 0.1982 | 0.00212 |  | 2812 | 32 | 2811 | 14 | 2811 | 17 |
| LX063-95 | 147.52 | 313.85 |  | 0.47 | 11.78679 | 0.16595 | 0.49439 | 0.00696 | 0.17302 | 0.00182 |  | 2590 | 30 | 2588 | 13 | 2587 | 17 |
| LX063-96 | 151.62 | 253.12 |  | 0.60 | 15.25025 | 0.21605 | 0.55163 | 0.00781 | 0.20064 | 0.00213 |  | 2832 | 32 | 2831 | 14 | 2831 | 17 |
| LX063-97 | 138.81 | 179.99 |  | 0.77 | 11.73883 | 0.17201 | 0.46714 | 0.00672 | 0.18237 | 0.00207 |  | 2471 | 30 | 2584 | 14 | 2675 | 19 |
| LX063-98 | 105.95 | 140.7 |  | 0.75 | 11.3809 | 0.188 | 0.4473 | 0.00686 | 0.18465 | 0.00257 |  | 2383 | 31 | 2555 | 15 | 2695 | 23 |
| LX063-99 | 76.5 | 165.75 |  | 0.46 | 11.72178 | 0.19344 | 0.4929 | 0.00753 | 0.17259 | 0.00238 |  | 2583 | 33 | 2582 | 15 | 2583 | 23 |
| LX063-100 | 50.5 | 107.52 |  | 0.47 | 13.18012 | 0.20973 | 0.51796 | 0.00777 | 0.18467 | 0.0024 |  | 2691 | 33 | 2693 | 15 | 2695 | 21 |
| LX063-101 | 329.05 | 240.78 |  | 1.37 | 5.21956 | 0.08067 | 0.33275 | 0.0048 | 0.11384 | 0.00142 |  | 1852 | 23 | 1856 | 13 | 1862 | 22 |
| LX063-102 | 6.66 | 13.43 |  | 0.50 | 11.21287 | 0.26304 | 0.4921 | 0.00897 | 0.16536 | 0.00366 |  | 2580 | 39 | 2541 | 22 | 2511 | 37 |
| LX063-103 | 95.75 | 251.63 |  | 0.38 | 5.09174 | 0.07666 | 0.32937 | 0.00471 | 0.11219 | 0.00134 |  | 1835 | 23 | 1835 | 13 | 1835 | 21 |
| LX063-104 | 74.16 | 168.54 |  | 0.44 | 13.9669 | 0.20421 | 0.53144 | 0.00765 | 0.19073 | 0.00215 |  | 2748 | 32 | 2748 | 14 | 2748 | 18 |
| LX063-105 | 121.64 | 193.61 |  | 0.63 | 10.57523 | 0.15193 | 0.47124 | 0.00669 | 0.16286 | 0.00178 |  | 2489 | 29 | 2487 | 13 | 2486 | 18 |
| LX063-106 | 401.56 | 267.88 |  | 1.50 | 10.60087 | 0.15136 | 0.47068 | 0.00667 | 0.16345 | 0.00176 |  | 2487 | 29 | 2489 | 13 | 2492 | 18 |
| LX063-107 | 53.17 | 74.42 |  | 0.71 | 5.69842 | 0.10496 | 0.34437 | 0.00531 | 0.12009 | 0.00196 |  | 1908 | 25 | 1931 | 16 | 1958 | 29 |
| LX063-108 | 82.08 | 105.21 |  | 0.78 | 10.54027 | 0.1565 | 0.47061 | 0.00678 | 0.16254 | 0.00188 |  | 2486 | 30 | 2484 | 14 | 2482 | 19 |
| LX063-109 | 155.19 | 143.06 |  | 1.08 | 11.13976 | 0.16651 | 0.48255 | 0.00699 | 0.16753 | 0.00196 |  | 2538 | 30 | 2535 | 14 | 2533 | 20 |
| LX063-110 | 42.7 | 239.14 |  | 0.18 | 10.01553 | 0.14771 | 0.45892 | 0.00659 | 0.15838 | 0.00181 |  | 2435 | 29 | 2436 | 14 | 2438 | 19 |
| LX063-111 | 238.88 | 467.18 |  | 0.51 | 15.31438 | 0.21325 | 0.5513 | 0.00774 | 0.20159 | 0.00207 |  | 2831 | 32 | 2835 | 13 | 2839 | 17 |
| LX063-112 | 120.33 | 342.08 |  | 0.35 | 10.5896 | 0.1494 | 0.47084 | 0.00663 | 0.16321 | 0.00172 |  | 2487 | 29 | 2488 | 13 | 2489 | 18 |
| LX063-113 | 78.05 | 101.25 |  | 0.77 | 9.95869 | 0.15156 | 0.45762 | 0.00666 | 0.15792 | 0.00191 |  | 2429 | 29 | 2431 | 14 | 2434 | 20 |
| LX063-114 | 45.78 | 100.13 |  | 0.46 | 8.51875 | 0.13524 | 0.42483 | 0.00628 | 0.14552 | 0.00189 |  | 2282 | 28 | 2288 | 14 | 2294 | 22 |
| LX063-115 | 33.89 | 49.43 |  | 0.69 | 10.90411 | 0.17994 | 0.47741 | 0.00726 | 0.16575 | 0.00229 |  | 2516 | 32 | 2515 | 15 | 2515 | 23 |
| LX063-116 | 167.82 | 319.01 |  | 0.53 | 14.11869 | 0.1974 | 0.5266 | 0.0074 | 0.19456 | 0.00201 |  | 2727 | 31 | 2758 | 13 | 2781 | 17 |
| LX063-117 | 40.85 | 102.28 |  | 0.40 | 12.91842 | 0.19344 | 0.51329 | 0.00746 | 0.18264 | 0.00215 |  | 2671 | 32 | 2674 | 14 | 2677 | 19 |
| LX063-118 | 161.27 | 300.61 |  | 0.54 | 10.20716 | 0.14463 | 0.46267 | 0.00653 | 0.16009 | 0.0017 |  | 2451 | 29 | 2454 | 13 | 2457 | 18 |
| LX063-119 | 210.71 | 385.36 |  | 0.55 | 13.60496 | 0.19281 | 0.52386 | 0.00741 | 0.18846 | 0.002 |  | 2716 | 31 | 2723 | 13 | 2729 | 17 |
| LX063-120 | 85.28 | 58.58 |  | 1.46 | 10.9804 | 0.18866 | 0.47698 | 0.00741 | 0.16705 | 0.00245 |  | 2514 | 32 | 2522 | 16 | 2528 | 24 |
| LX06-4 (leptynite) | | | | | | | | | | | | | | | | | |
| LX064-01 | 110.3 | 90.29 |  | 1.22 | 7.06553 | 0.12067 | 0.38737 | 0.00588 | 0.13226 | 0.00192 |  | 2111 | 27 | 2120 | 15 | 2128 | 25 |
| LX064-02 | 48.71 | 71.79 |  | 0.68 | 11.45532 | 0.1773 | 0.48528 | 0.00716 | 0.17117 | 0.00211 |  | 2550 | 31 | 2561 | 14 | 2569 | 20 |
| LX064-03 | 15.81 | 30.98 |  | 0.51 | 11.62428 | 0.21039 | 0.48807 | 0.00767 | 0.1727 | 0.00271 |  | 2562 | 33 | 2575 | 17 | 2584 | 26 |
| LX064-04 | 149.17 | 307.1 |  | 0.49 | 14.97059 | 0.21279 | 0.54477 | 0.00773 | 0.19927 | 0.00209 |  | 2803 | 32 | 2813 | 14 | 2820 | 17 |
| LX064-05 | 233.3 | 146.46 |  | 1.59 | 10.8594 | 0.1596 | 0.47541 | 0.00683 | 0.16564 | 0.00186 |  | 2507 | 30 | 2511 | 14 | 2514 | 19 |
| LX064-06 | 174.41 | 140.5 |  | 1.24 | 10.02907 | 0.14972 | 0.45781 | 0.00662 | 0.15885 | 0.00183 |  | 2430 | 29 | 2438 | 14 | 2444 | 19 |
| LX064-08 | 59.05 | 92.21 |  | 0.64 | 7.93039 | 0.14516 | 0.40971 | 0.00644 | 0.14036 | 0.00225 |  | 2214 | 29 | 2223 | 17 | 2232 | 27 |
| LX064-09 | 81.45 | 290.3 |  | 0.28 | 4.94096 | 0.07421 | 0.32409 | 0.00464 | 0.11055 | 0.00129 |  | 1810 | 23 | 1809 | 13 | 1809 | 21 |
| LX064-10 | 112.05 | 244.69 |  | 0.46 | 15.73401 | 0.23002 | 0.5569 | 0.00803 | 0.20488 | 0.00227 |  | 2854 | 33 | 2861 | 14 | 2865 | 18 |
| LX064-11 | 51.5 | 140.61 |  | 0.37 | 12.89591 | 0.19251 | 0.51348 | 0.00746 | 0.18212 | 0.0021 |  | 2672 | 32 | 2672 | 14 | 2672 | 19 |
| LX064-12 | 77.05 | 139.21 |  | 0.55 | 10.40394 | 0.15467 | 0.45486 | 0.00657 | 0.16586 | 0.0019 |  | 2417 | 29 | 2471 | 14 | 2516 | 19 |
| LX064-13 | 49.65 | 165.29 |  | 0.30 | 5.14291 | 0.08099 | 0.3304 | 0.00481 | 0.11288 | 0.00143 |  | 1840 | 23 | 1843 | 13 | 1846 | 23 |
| LX064-14 | 64.09 | 98.55 |  | 0.65 | 11.06676 | 0.16977 | 0.47868 | 0.00702 | 0.16766 | 0.00203 |  | 2522 | 31 | 2529 | 14 | 2534 | 20 |
| LX064-15 | 130.18 | 183.46 |  | 0.71 | 10.47012 | 0.15364 | 0.4679 | 0.00671 | 0.16227 | 0.00181 |  | 2474 | 29 | 2477 | 14 | 2480 | 19 |
| LX064-16 | 102.62 | 136.14 |  | 0.75 | 10.85356 | 0.1643 | 0.47497 | 0.00692 | 0.16571 | 0.00195 |  | 2505 | 30 | 2511 | 14 | 2515 | 20 |
| LX064-17 | 0.0066 | 23.41 |  | 0.00 | 5.28058 | 0.14918 | 0.33426 | 0.00622 | 0.11456 | 0.00316 |  | 1859 | 30 | 1866 | 24 | 1873 | 49 |
| LX064-18 | 103.68 | 554.9 |  | 0.19 | 4.90496 | 0.07162 | 0.32322 | 0.00459 | 0.11005 | 0.00122 |  | 1806 | 22 | 1803 | 12 | 1800 | 20 |
| LX064-19 | 83.46 | 928.3 |  | 0.09 | 5.26059 | 0.07787 | 0.33481 | 0.00473 | 0.11394 | 0.00128 |  | 1862 | 23 | 1863 | 13 | 1863 | 20 |
| LX064-20 | 36.98 | 47.08 |  | 0.79 | 10.752 | 0.18995 | 0.47443 | 0.00737 | 0.16435 | 0.00248 |  | 2503 | 32 | 2502 | 16 | 2501 | 25 |
| LX064-21 | 299.25 | 474.01 |  | 0.63 | 10.73163 | 0.15279 | 0.4725 | 0.00669 | 0.16471 | 0.00173 |  | 2495 | 29 | 2500 | 13 | 2505 | 18 |
| LX064-22 | 9.17 | 28.54 |  | 0.32 | 10.98537 | 0.38053 | 0.47623 | 0.01092 | 0.16728 | 0.00578 |  | 2511 | 48 | 2522 | 32 | 2531 | 57 |
| LX064-23 | 141.86 | 223.91 |  | 0.63 | 5.09849 | 0.08074 | 0.32911 | 0.00478 | 0.11234 | 0.00143 |  | 1834 | 23 | 1836 | 13 | 1838 | 23 |
| LX064-24 | 46.74 | 126.25 |  | 0.37 | 14.35061 | 0.23389 | 0.53594 | 0.00795 | 0.19418 | 0.00257 |  | 2766 | 33 | 2773 | 15 | 2778 | 22 |
| LX064-25 | 126.75 | 138.53 |  | 0.91 | 11.40936 | 0.17311 | 0.48638 | 0.00708 | 0.17011 | 0.00201 |  | 2555 | 31 | 2557 | 14 | 2559 | 20 |
| LX064-26 | 93.79 | 181.05 |  | 0.52 | 11.15753 | 0.16541 | 0.48024 | 0.00693 | 0.16849 | 0.00191 |  | 2528 | 30 | 2536 | 14 | 2543 | 19 |
| LX064-27 | 142.76 | 231.69 |  | 0.62 | 13.04864 | 0.20187 | 0.51531 | 0.00766 | 0.18364 | 0.00226 |  | 2679 | 33 | 2683 | 15 | 2686 | 20 |
| LX064-28 | 198.49 | 204.72 |  | 0.97 | 10.71484 | 0.1613 | 0.47307 | 0.00687 | 0.16425 | 0.00191 |  | 2497 | 30 | 2499 | 14 | 2500 | 19 |
| LX064-29 | 39.48 | 188.54 |  | 0.21 | 14.32263 | 0.21252 | 0.5365 | 0.00778 | 0.1936 | 0.00219 |  | 2769 | 33 | 2771 | 14 | 2773 | 18 |
| LX064-30 | 25.92 | 79.46 |  | 0.33 | 10.98497 | 0.19657 | 0.48184 | 0.00762 | 0.16533 | 0.00254 |  | 2535 | 33 | 2522 | 17 | 2511 | 26 |
| LX064-31 | 56.28 | 168.61 |  | 0.33 | 11.06657 | 0.16612 | 0.47898 | 0.00695 | 0.16756 | 0.00194 |  | 2523 | 30 | 2529 | 14 | 2533 | 19 |
| LX064-32 | 27.68 | 35.87 |  | 0.77 | 13.60756 | 0.24339 | 0.52431 | 0.00841 | 0.18822 | 0.00288 |  | 2717 | 36 | 2723 | 17 | 2727 | 25 |
| LX064-33 | 81.68 | 230.42 |  | 0.35 | 12.18635 | 0.18147 | 0.49947 | 0.00723 | 0.17694 | 0.00201 |  | 2612 | 31 | 2619 | 14 | 2624 | 19 |
| LX064-34 | 145.47 | 122.22 |  | 1.19 | 11.01435 | 0.16992 | 0.47841 | 0.00703 | 0.16696 | 0.00203 |  | 2520 | 31 | 2524 | 14 | 2527 | 20 |
| LX064-35 | 62.33 | 139.01 |  | 0.45 | 10.85233 | 0.1955 | 0.4738 | 0.00754 | 0.16611 | 0.00258 |  | 2500 | 33 | 2511 | 17 | 2519 | 26 |
| LX064-36 | 50.16 | 123.73 |  | 0.41 | 9.36031 | 0.14515 | 0.41213 | 0.00606 | 0.16471 | 0.00203 |  | 2225 | 28 | 2374 | 14 | 2505 | 21 |
| LX064-37 | 200.96 | 204.17 |  | 0.98 | 10.88737 | 0.17845 | 0.47395 | 0.0072 | 0.16659 | 0.00224 |  | 2501 | 31 | 2514 | 15 | 2524 | 22 |
| LX064-38 | 72.4 | 541.99 |  | 0.13 | 12.99618 | 0.18994 | 0.51544 | 0.0074 | 0.18286 | 0.002 |  | 2680 | 31 | 2679 | 14 | 2679 | 18 |
| LX064-39 | 163.32 | 160.52 |  | 1.02 | 11.4266 | 0.17271 | 0.48605 | 0.00702 | 0.17049 | 0.00199 |  | 2554 | 30 | 2559 | 14 | 2563 | 19 |
| LX064-40 | 71.32 | 103.83 |  | 0.69 | 11.51825 | 0.2075 | 0.48756 | 0.00781 | 0.17133 | 0.00266 |  | 2560 | 34 | 2566 | 17 | 2571 | 26 |
| LX064-41 | 31.24 | 43.68 |  | 0.72 | 5.01243 | 0.11581 | 0.32651 | 0.00538 | 0.11133 | 0.00241 |  | 1822 | 26 | 1821 | 20 | 1821 | 39 |
| LX064-42 | 38.99 | 67.09 |  | 0.58 | 11.29261 | 0.20122 | 0.48414 | 0.00746 | 0.16916 | 0.00257 |  | 2545 | 32 | 2548 | 17 | 2549 | 25 |
| LX064-43 | 50.09 | 53.24 |  | 0.94 | 10.80231 | 0.21576 | 0.47578 | 0.00787 | 0.16466 | 0.00294 |  | 2509 | 34 | 2506 | 19 | 2504 | 30 |
| LX064-44 | 43.08 | 122.1 |  | 0.35 | 7.39568 | 0.12902 | 0.38903 | 0.00581 | 0.13787 | 0.00203 |  | 2118 | 27 | 2160 | 16 | 2201 | 25 |
| LX064-45 | 32.05 | 69.55 |  | 0.46 | 10.75357 | 0.19441 | 0.47324 | 0.00738 | 0.1648 | 0.00256 |  | 2498 | 32 | 2502 | 17 | 2506 | 26 |
| LX064-46 | 58.05 | 77.89 |  | 0.75 | 13.25756 | 0.21303 | 0.51934 | 0.00783 | 0.18513 | 0.00239 |  | 2696 | 33 | 2698 | 15 | 2699 | 21 |
| LX064-47 | 468.24 | 382.12 |  | 1.23 | 11.54463 | 0.17135 | 0.48786 | 0.00704 | 0.17162 | 0.00193 |  | 2561 | 31 | 2568 | 14 | 2574 | 19 |
| LX064-48 | 82.85 | 126.24 |  | 0.66 | 7.84066 | 0.12406 | 0.40934 | 0.00598 | 0.13892 | 0.00175 |  | 2212 | 27 | 2213 | 14 | 2214 | 22 |
| LX064-49 | 100.34 | 140.7 |  | 0.71 | 10.78061 | 0.16531 | 0.47457 | 0.0069 | 0.16475 | 0.00196 |  | 2504 | 30 | 2504 | 14 | 2505 | 20 |
| LX064-50 | 68.19 | 91.23 |  | 0.75 | 10.10423 | 0.15942 | 0.44579 | 0.00661 | 0.16438 | 0.00207 |  | 2377 | 29 | 2444 | 15 | 2501 | 21 |
| LX064-51 | 165.36 | 219.7 |  | 0.75 | 10.6375 | 0.1623 | 0.47231 | 0.00689 | 0.16334 | 0.00193 |  | 2494 | 30 | 2492 | 14 | 2491 | 20 |
| LX064-52 | 70.15 | 157.22 |  | 0.45 | 14.32766 | 0.23407 | 0.55237 | 0.00843 | 0.18812 | 0.00249 |  | 2835 | 35 | 2772 | 16 | 2726 | 22 |
| LX064-53 | 150.69 | 329.43 |  | 0.46 | 15.03705 | 0.21536 | 0.54826 | 0.00779 | 0.19891 | 0.00208 |  | 2818 | 32 | 2818 | 14 | 2817 | 17 |
| LX064-54 | 69.3 | 66.1 |  | 1.05 | 10.8075 | 0.17912 | 0.47424 | 0.00717 | 0.16528 | 0.00225 |  | 2502 | 31 | 2507 | 15 | 2510 | 23 |
| LX064-55 | 95.37 | 214.78 |  | 0.44 | 15.44565 | 0.22468 | 0.55365 | 0.00793 | 0.20233 | 0.00218 |  | 2840 | 33 | 2843 | 14 | 2845 | 17 |
| LX064-56 | 112.53 | 409.95 |  | 0.27 | 15.08129 | 0.21581 | 0.54936 | 0.00779 | 0.1991 | 0.00208 |  | 2823 | 32 | 2820 | 14 | 2819 | 17 |
| LX064-57 | 269.56 | 497.82 |  | 0.54 | 10.55535 | 0.1519 | 0.47085 | 0.00669 | 0.16258 | 0.00172 |  | 2487 | 29 | 2485 | 13 | 2483 | 18 |
| LX064-58 | 30.89 | 62.13 |  | 0.50 | 10.75337 | 0.19192 | 0.47363 | 0.00739 | 0.16466 | 0.0025 |  | 2500 | 32 | 2502 | 17 | 2504 | 25 |
| LX064-59 | 40.19 | 104.56 |  | 0.38 | 10.93456 | 0.17502 | 0.47749 | 0.00713 | 0.16608 | 0.00213 |  | 2516 | 31 | 2518 | 15 | 2519 | 21 |
| LX064-60 | 70.41 | 100.14 |  | 0.70 | 11.5446 | 0.18074 | 0.48923 | 0.00724 | 0.17114 | 0.00211 |  | 2567 | 31 | 2568 | 15 | 2569 | 20 |
| LX064-61 | 225.97 | 137.11 |  | 1.65 | 10.94755 | 0.16572 | 0.47773 | 0.00694 | 0.1662 | 0.00193 |  | 2517 | 30 | 2519 | 14 | 2520 | 19 |
| LX064-62 | 114.9 | 168.17 |  | 0.68 | 10.78832 | 0.16106 | 0.47568 | 0.00687 | 0.16449 | 0.00186 |  | 2508 | 30 | 2505 | 14 | 2502 | 19 |
| LX064-63 | 35.49 | 53.07 |  | 0.67 | 13.79076 | 0.23418 | 0.52811 | 0.00821 | 0.18939 | 0.00266 |  | 2734 | 35 | 2735 | 16 | 2737 | 23 |
| LX064-64 | 3.6 | 8 |  | 0.45 | 8.44465 | 0.33039 | 0.36598 | 0.00837 | 0.16735 | 0.00663 |  | 2011 | 40 | 2280 | 36 | 2531 | 65 |
| LX064-65 | 175.52 | 118.77 |  | 1.48 | 10.83565 | 0.16873 | 0.47748 | 0.00704 | 0.16458 | 0.00201 |  | 2516 | 31 | 2509 | 14 | 2503 | 20 |
| LX064-66 | 23.52 | 68.55 |  | 0.34 | 11.67307 | 0.19255 | 0.49248 | 0.00747 | 0.17191 | 0.00231 |  | 2581 | 32 | 2579 | 15 | 2576 | 22 |
| LX064-67 | 164.1 | 303.01 |  | 0.54 | 10.58685 | 0.15447 | 0.47086 | 0.00673 | 0.16307 | 0.00176 |  | 2487 | 29 | 2488 | 14 | 2488 | 18 |
| LX064-68 | 20.99 | 30.33 |  | 0.69 | 11.29927 | 0.23665 | 0.48512 | 0.00827 | 0.16893 | 0.0032 |  | 2550 | 36 | 2548 | 20 | 2547 | 31 |
| LX064-69 | 53.4 | 147.64 |  | 0.36 | 14.58544 | 0.22739 | 0.53951 | 0.00799 | 0.19607 | 0.00239 |  | 2781 | 33 | 2789 | 15 | 2794 | 20 |
| LX064-70 | 25.65 | 101.66 |  | 0.25 | 11.09546 | 0.17709 | 0.48135 | 0.00716 | 0.16718 | 0.00213 |  | 2533 | 31 | 2531 | 15 | 2530 | 21 |
| LX064-71 | 79.47 | 83.01 |  | 0.96 | 10.37608 | 0.17059 | 0.46732 | 0.00702 | 0.16103 | 0.00215 |  | 2472 | 31 | 2469 | 15 | 2467 | 22 |
| LX064-72 | 139.92 | 109.68 |  | 1.28 | 4.98571 | 0.08846 | 0.32524 | 0.00487 | 0.11118 | 0.00167 |  | 1815 | 24 | 1817 | 15 | 1819 | 27 |
| LX064-73 | 74.12 | 270.6 |  | 0.27 | 15.36176 | 0.22309 | 0.55062 | 0.00787 | 0.20234 | 0.00216 |  | 2828 | 33 | 2838 | 14 | 2845 | 17 |
| LX064-74 | 36.6 | 42.37 |  | 0.86 | 4.98327 | 0.10564 | 0.32506 | 0.0053 | 0.11118 | 0.00216 |  | 1814 | 26 | 1817 | 18 | 1819 | 35 |
| LX064-75 | 56.05 | 66.14 |  | 0.85 | 10.46337 | 0.16923 | 0.46836 | 0.00702 | 0.16203 | 0.00211 |  | 2476 | 31 | 2477 | 15 | 2477 | 22 |
| LX064-76 | 51.47 | 78.81 |  | 0.65 | 12.45037 | 0.19669 | 0.50555 | 0.00753 | 0.17861 | 0.00223 |  | 2638 | 32 | 2639 | 15 | 2640 | 21 |
| LX064-77 | 73.19 | 147.52 |  | 0.50 | 5.27716 | 0.0853 | 0.33565 | 0.00494 | 0.11403 | 0.00148 |  | 1866 | 24 | 1865 | 14 | 1865 | 23 |
| LX064-78 | 0.025 | 50.06 |  | 0.00 | 5.38241 | 0.11192 | 0.33882 | 0.00551 | 0.11522 | 0.00218 |  | 1881 | 27 | 1882 | 18 | 1883 | 34 |
| LX064-79 | 11.66 | 38.81 |  | 0.30 | 11.56999 | 0.22297 | 0.48958 | 0.0081 | 0.1714 | 0.0029 |  | 2569 | 35 | 2570 | 18 | 2571 | 28 |
| LX064-80 | 92.37 | 89.8 |  | 1.03 | 10.77288 | 0.1889 | 0.47347 | 0.00742 | 0.16502 | 0.00244 |  | 2499 | 32 | 2504 | 16 | 2508 | 25 |
| LX064-81 | 55.24 | 95.42 |  | 0.58 | 13.03299 | 0.23402 | 0.51692 | 0.00831 | 0.18286 | 0.00279 |  | 2686 | 35 | 2682 | 17 | 2679 | 25 |
| LX064-82 | 14.86 | 15.61 |  | 0.95 | 10.9108 | 0.31772 | 0.47627 | 0.00995 | 0.16615 | 0.00471 |  | 2511 | 43 | 2516 | 27 | 2519 | 47 |
| LX064-83 | 178.4 | 118.57 |  | 1.50 | 10.95786 | 0.17521 | 0.47785 | 0.00714 | 0.16631 | 0.00212 |  | 2518 | 31 | 2520 | 15 | 2521 | 21 |
| LX064-84 | 114.18 | 109.07 |  | 1.05 | 11.02682 | 0.18806 | 0.47618 | 0.00736 | 0.16795 | 0.00238 |  | 2511 | 32 | 2525 | 16 | 2537 | 24 |
| LX064-85 | 96.13 | 156.48 |  | 0.61 | 8.30997 | 0.12872 | 0.38752 | 0.00567 | 0.15553 | 0.00188 |  | 2111 | 26 | 2265 | 14 | 2408 | 20 |
| LX064-86 | 134.5 | 115.71 |  | 1.16 | 11.32337 | 0.17952 | 0.48387 | 0.0072 | 0.16973 | 0.00212 |  | 2544 | 31 | 2550 | 15 | 2555 | 21 |
| LX064-87 | 286.35 | 285.8 |  | 1.00 | 11.1812 | 0.16575 | 0.48248 | 0.00694 | 0.16808 | 0.00186 |  | 2538 | 30 | 2538 | 14 | 2539 | 18 |
| LX064-88 | 44.01 | 32.62 |  | 1.35 | 11.79548 | 0.22332 | 0.49424 | 0.00807 | 0.17309 | 0.00285 |  | 2589 | 35 | 2588 | 18 | 2588 | 27 |
| LX064-89 | 61.65 | 139.84 |  | 0.44 | 16.14915 | 0.24773 | 0.56515 | 0.00834 | 0.20724 | 0.00244 |  | 2888 | 34 | 2886 | 15 | 2884 | 19 |
| LX064-90 | 175.17 | 180.19 |  | 0.97 | 11.06982 | 0.16895 | 0.48042 | 0.00701 | 0.16712 | 0.00195 |  | 2529 | 31 | 2529 | 14 | 2529 | 19 |
| LX064-91 | 27.48 | 33.46 |  | 0.82 | 5.19665 | 0.13222 | 0.33623 | 0.0058 | 0.11209 | 0.00271 |  | 1869 | 28 | 1852 | 22 | 1834 | 43 |
| LX064-92 | 10.4 | 111.54 |  | 0.09 | 9.88113 | 0.17321 | 0.4551 | 0.0071 | 0.15747 | 0.00232 |  | 2418 | 31 | 2424 | 16 | 2429 | 25 |
| LX064-93 | 121.76 | 197.6 |  | 0.62 | 11.07297 | 0.16711 | 0.47962 | 0.00696 | 0.16744 | 0.00191 |  | 2526 | 30 | 2529 | 14 | 2532 | 19 |
| LX064-94 | 68.23 | 264.15 |  | 0.26 | 5.34789 | 0.08401 | 0.33742 | 0.00491 | 0.11495 | 0.00142 |  | 1874 | 24 | 1877 | 13 | 1879 | 22 |
| LX064-95 | 103.37 | 222.18 |  | 0.47 | 16.07191 | 0.23776 | 0.56361 | 0.00813 | 0.20682 | 0.00227 |  | 2882 | 34 | 2881 | 14 | 2881 | 18 |
| LX064-96 | 268.65 | 348.92 |  | 0.77 | 5.2904 | 0.08107 | 0.3357 | 0.00485 | 0.1143 | 0.00134 |  | 1866 | 23 | 1867 | 13 | 1869 | 21 |
| LX064-97 | 118.66 | 93.18 |  | 1.27 | 11.43127 | 0.19023 | 0.48553 | 0.00741 | 0.17076 | 0.00231 |  | 2551 | 32 | 2559 | 16 | 2565 | 22 |
| LX064-98 | 58.85 | 184.57 |  | 0.32 | 15.64978 | 0.23758 | 0.55806 | 0.00817 | 0.20339 | 0.00234 |  | 2859 | 34 | 2856 | 14 | 2854 | 19 |
| LX064-99 | 57.19 | 156.43 |  | 0.37 | 14.16558 | 0.22253 | 0.52438 | 0.00782 | 0.19592 | 0.0024 |  | 2718 | 33 | 2761 | 15 | 2793 | 20 |
| LX064-100 | 42.86 | 102.7 |  | 0.42 | 15.28257 | 0.25591 | 0.5527 | 0.00857 | 0.20054 | 0.00273 |  | 2836 | 36 | 2833 | 16 | 2831 | 22 |
| LX064-101 | 69.99 | 163.25 |  | 0.43 | 12.83694 | 0.19802 | 0.51263 | 0.00754 | 0.18162 | 0.00215 |  | 2668 | 32 | 2668 | 15 | 2668 | 19 |
| LX064-102 | 185.62 | 303.85 |  | 0.61 | 9.47758 | 0.14095 | 0.43181 | 0.00621 | 0.15918 | 0.00176 |  | 2314 | 28 | 2385 | 14 | 2447 | 19 |
| LX064-103 | 48.26 | 49.86 |  | 0.97 | 10.49033 | 0.2182 | 0.46823 | 0.00804 | 0.16249 | 0.00305 |  | 2476 | 35 | 2479 | 19 | 2482 | 31 |
| LX064-104 | 78.84 | 182.2 |  | 0.43 | 16.04294 | 0.24151 | 0.56406 | 0.00822 | 0.20628 | 0.00233 |  | 2883 | 34 | 2879 | 14 | 2877 | 18 |
| LX064-105 | 88.71 | 186.63 |  | 0.48 | 8.33381 | 0.13198 | 0.41866 | 0.00617 | 0.14437 | 0.0018 |  | 2254 | 28 | 2268 | 14 | 2280 | 21 |
| LX064-106 | 21.18 | 64.3 |  | 0.33 | 12.98842 | 0.22923 | 0.51538 | 0.00818 | 0.18278 | 0.00271 |  | 2680 | 35 | 2679 | 17 | 2678 | 24 |
| LX064-107 | 161.74 | 330.89 |  | 0.49 | 10.93715 | 0.16201 | 0.47791 | 0.00687 | 0.16598 | 0.00182 |  | 2518 | 30 | 2518 | 14 | 2518 | 18 |
| LX064-108 | 48.32 | 75.61 |  | 0.64 | 11.51045 | 0.19428 | 0.48754 | 0.00746 | 0.17123 | 0.00237 |  | 2560 | 32 | 2565 | 16 | 2570 | 23 |
| LX064-109 | 43.9 | 117.05 |  | 0.38 | 10.86552 | 0.17231 | 0.47545 | 0.00706 | 0.16575 | 0.00206 |  | 2507 | 31 | 2512 | 15 | 2515 | 21 |
| LX064-110 | 111.76 | 202.09 |  | 0.55 | 11.54782 | 0.17364 | 0.48933 | 0.00708 | 0.17116 | 0.00193 |  | 2568 | 31 | 2569 | 14 | 2569 | 19 |
| LX064-111 | 90.65 | 137.67 |  | 0.66 | 10.42814 | 0.16681 | 0.46551 | 0.00693 | 0.16247 | 0.00205 |  | 2464 | 31 | 2474 | 15 | 2482 | 21 |
| LX064-112 | 71.23 | 128.77 |  | 0.55 | 11.70297 | 0.18583 | 0.49021 | 0.00728 | 0.17315 | 0.00215 |  | 2572 | 31 | 2581 | 15 | 2588 | 21 |
| LX064-113 | 21.38 | 46.63 |  | 0.46 | 16.40197 | 0.27665 | 0.56812 | 0.00886 | 0.20939 | 0.00287 |  | 2900 | 36 | 2901 | 16 | 2901 | 22 |
| LX064-114 | 133.82 | 147.47 |  | 0.91 | 10.45335 | 0.16877 | 0.46828 | 0.00701 | 0.1619 | 0.00207 |  | 2476 | 31 | 2476 | 15 | 2476 | 21 |
| LX064-115 | 350.26 | 474.71 |  | 0.74 | 15.63258 | 0.22707 | 0.5583 | 0.00796 | 0.20307 | 0.00213 |  | 2860 | 33 | 2855 | 14 | 2851 | 17 |
| LX064-116 | 170.39 | 272.37 |  | 0.63 | 16.26362 | 0.23886 | 0.56621 | 0.00812 | 0.20832 | 0.00223 |  | 2892 | 33 | 2892 | 14 | 2893 | 17 |
| LX064-117 | 44.21 | 87.85 |  | 0.50 | 7.45835 | 0.13344 | 0.39499 | 0.00612 | 0.13695 | 0.00208 |  | 2146 | 28 | 2168 | 16 | 2189 | 26 |
| LX064-118 | 29.51 | 235.18 |  | 0.13 | 13.54306 | 0.20507 | 0.52674 | 0.00767 | 0.18647 | 0.00212 |  | 2728 | 32 | 2718 | 14 | 2711 | 19 |
| LX064-119 | 210.33 | 312.86 |  | 0.67 | 11.12587 | 0.1638 | 0.48228 | 0.00691 | 0.16731 | 0.0018 |  | 2537 | 30 | 2534 | 14 | 2531 | 18 |
| LX064-120 | 110.58 | 200.97 |  | 0.55 | 10.80434 | 0.16481 | 0.47522 | 0.00692 | 0.16489 | 0.0019 |  | 2506 | 30 | 2506 | 14 | 2506 | 19 |
| LX06-5 (leptynite) | | | | | | | | | | | | | | | | | |
| LX065-01 | 50.73 | 824.31 |  | 0.06 | 4.59977 | 0.05613 | 0.29408 | 0.00315 | 0.11344 | 0.00184 |  | 1662 | 16 | 1749 | 10 | 1855 | 30 |
| LX065-02 | 173.7 | 208.46 |  | 0.83 | 10.2953 | 0.1293 | 0.46966 | 0.00518 | 0.15895 | 0.00191 |  | 2482 | 23 | 2462 | 12 | 2445 | 9 |
| LX065-03 | 75.83 | 239.66 |  | 0.32 | 10.55095 | 0.1316 | 0.47083 | 0.00519 | 0.16249 | 0.00194 |  | 2487 | 23 | 2484 | 12 | 2482 | 9 |
| LX065-04 | 78.17 | 193.16 |  | 0.40 | 11.31382 | 0.14206 | 0.48857 | 0.0054 | 0.16791 | 0.00202 |  | 2564 | 23 | 2549 | 12 | 2537 | 9 |
| LX065-05 | 98.58 | 143.71 |  | 0.69 | 8.08111 | 0.14887 | 0.39758 | 0.00472 | 0.14742 | 0.00323 |  | 2158 | 22 | 2240 | 17 | 2316 | 38 |
| LX065-06 | 152.91 | 182.98 |  | 0.84 | 12.43491 | 0.1551 | 0.50397 | 0.00556 | 0.17891 | 0.00214 |  | 2631 | 24 | 2638 | 12 | 2643 | 9 |
| LX065-07 | 88.76 | 158.36 |  | 0.56 | 11.15412 | 0.14024 | 0.48734 | 0.00538 | 0.16596 | 0.002 |  | 2559 | 23 | 2536 | 12 | 2517 | 9 |
| LX065-08 | 109.52 | 222.84 |  | 0.49 | 14.19244 | 0.20623 | 0.52237 | 0.00595 | 0.19705 | 0.00364 |  | 2709 | 25 | 2763 | 14 | 2802 | 31 |
| LX065-09 | 39.85 | 118.88 |  | 0.34 | 7.75272 | 0.13645 | 0.3843 | 0.00446 | 0.14631 | 0.00309 |  | 2096 | 21 | 2203 | 16 | 2303 | 37 |
| LX065-10 | 48.13 | 134.32 |  | 0.36 | 11.52155 | 0.14828 | 0.48866 | 0.00544 | 0.17096 | 0.00212 |  | 2565 | 24 | 2566 | 12 | 2567 | 10 |
| LX065-11 | 419.21 | 341.18 |  | 1.23 | 10.68548 | 0.1328 | 0.47216 | 0.0052 | 0.1641 | 0.00195 |  | 2493 | 23 | 2496 | 12 | 2498 | 9 |
| LX065-12 | 70.78 | 288.9 |  | 0.24 | 7.20547 | 0.10623 | 0.3648 | 0.00408 | 0.14325 | 0.00265 |  | 2005 | 19 | 2137 | 13 | 2267 | 33 |
| LX065-13 | 101.11 | 236.54 |  | 0.43 | 14.84171 | 0.1841 | 0.54561 | 0.00601 | 0.19724 | 0.00234 |  | 2807 | 25 | 2805 | 12 | 2803 | 9 |
| LX065-14 | 48.33 | 172.89 |  | 0.28 | 10.46985 | 0.13354 | 0.46534 | 0.00516 | 0.16314 | 0.002 |  | 2463 | 23 | 2477 | 12 | 2488 | 10 |
| LX065-15 | 65.96 | 108.65 |  | 0.61 | 10.98645 | 0.14346 | 0.47924 | 0.00535 | 0.16623 | 0.00209 |  | 2524 | 23 | 2522 | 12 | 2520 | 10 |
| LX065-16 | 83.02 | 75.81 |  | 1.10 | 10.79537 | 0.14377 | 0.47463 | 0.00533 | 0.16493 | 0.00212 |  | 2504 | 23 | 2506 | 12 | 2507 | 10 |
| LX065-17 | 104.67 | 272.76 |  | 0.38 | 13.52387 | 0.16943 | 0.52035 | 0.00575 | 0.18845 | 0.00226 |  | 2701 | 24 | 2717 | 12 | 2729 | 9 |
| LX065-18 | 102.94 | 176.71 |  | 0.58 | 6.73258 | 0.08778 | 0.37925 | 0.00421 | 0.12872 | 0.00162 |  | 2073 | 20 | 2077 | 12 | 2081 | 10 |
| LX065-19 | 150.15 | 181.41 |  | 0.83 | 12.9423 | 0.16417 | 0.514 | 0.0057 | 0.18258 | 0.00222 |  | 2674 | 24 | 2675 | 12 | 2676 | 9 |
| LX065-20 | 37.84 | 112.86 |  | 0.34 | 9.8632 | 0.12857 | 0.45493 | 0.00507 | 0.15721 | 0.00197 |  | 2417 | 22 | 2422 | 12 | 2426 | 10 |
| LX065-21 | 135.51 | 433.92 |  | 0.31 | 8.64203 | 0.12055 | 0.40211 | 0.00447 | 0.15587 | 0.00278 |  | 2179 | 21 | 2301 | 13 | 2411 | 31 |
| LX065-22 | 84.19 | 467.82 |  | 0.18 | 8.52885 | 0.11028 | 0.39405 | 0.0043 | 0.15698 | 0.00266 |  | 2142 | 20 | 2289 | 12 | 2423 | 29 |
| LX065-23 | 37.1 | 141.58 |  | 0.26 | 10.6747 | 0.13804 | 0.47379 | 0.00527 | 0.16337 | 0.00203 |  | 2500 | 23 | 2495 | 12 | 2491 | 10 |
| LX065-24 | 232.59 | 168.9 |  | 1.38 | 4.95271 | 0.06577 | 0.32469 | 0.00361 | 0.11061 | 0.00142 |  | 1813 | 18 | 1811 | 11 | 1809 | 11 |
| LX065-25 | 86.16 | 102.83 |  | 0.84 | 9.77854 | 0.21797 | 0.45629 | 0.00576 | 0.15543 | 0.00398 |  | 2423 | 26 | 2414 | 21 | 2407 | 45 |
| LX065-26 | 31.73 | 73.06 |  | 0.43 | 10.57221 | 0.1757 | 0.47095 | 0.00551 | 0.16281 | 0.00331 |  | 2488 | 24 | 2486 | 15 | 2485 | 35 |
| LX065-27 | 26.25 | 57.63 |  | 0.46 | 11.3464 | 0.19274 | 0.47235 | 0.00558 | 0.17422 | 0.00361 |  | 2494 | 24 | 2552 | 16 | 2599 | 35 |
| LX065-28 | 101.83 | 226.17 |  | 0.45 | 12.19878 | 0.15329 | 0.50126 | 0.00553 | 0.17646 | 0.00212 |  | 2619 | 24 | 2620 | 12 | 2620 | 9 |
| LX065-29 | 67.69 | 176.88 |  | 0.38 | 12.9323 | 0.16599 | 0.51242 | 0.0057 | 0.183 | 0.00226 |  | 2667 | 24 | 2675 | 12 | 2680 | 9 |
| LX065-30 | 80.93 | 117.75 |  | 0.69 | 6.06603 | 0.1386 | 0.32808 | 0.00405 | 0.1341 | 0.00348 |  | 1829 | 20 | 1985 | 20 | 2152 | 46 |
| LX065-31 | 41 | 66.11 |  | 0.62 | 9.9812 | 0.17628 | 0.43569 | 0.00518 | 0.16615 | 0.00354 |  | 2331 | 23 | 2433 | 16 | 2519 | 37 |
| LX065-32 | 51.49 | 68.22 |  | 0.75 | 9.50797 | 0.13253 | 0.42956 | 0.00488 | 0.1605 | 0.00218 |  | 2304 | 22 | 2388 | 13 | 2461 | 11 |
| LX065-33 | 226.26 | 305.11 |  | 0.74 | 14.19274 | 0.17781 | 0.5297 | 0.00584 | 0.19429 | 0.00233 |  | 2740 | 25 | 2763 | 12 | 2779 | 9 |
| LX065-34 | 186.59 | 503.14 |  | 0.37 | 13.28677 | 0.16539 | 0.47262 | 0.0052 | 0.20385 | 0.00242 |  | 2495 | 23 | 2700 | 12 | 2857 | 9 |
| LX065-35 | 23.35 | 76.24 |  | 0.31 | 12.32973 | 0.16542 | 0.50466 | 0.00569 | 0.17716 | 0.0023 |  | 2634 | 24 | 2630 | 13 | 2626 | 10 |
| LX065-36 | 295.41 | 453.47 |  | 0.65 | 10.04304 | 0.1263 | 0.45141 | 0.00498 | 0.16133 | 0.00194 |  | 2402 | 22 | 2439 | 12 | 2470 | 9 |
| LX065-37 | 37.92 | 294.32 |  | 0.13 | 9.67858 | 0.1234 | 0.44863 | 0.00496 | 0.15644 | 0.00191 |  | 2389 | 22 | 2405 | 12 | 2418 | 10 |
| LX065-38 | 120.45 | 80.13 |  | 1.50 | 3.71176 | 0.15375 | 0.25225 | 0.00357 | 0.10672 | 0.00467 |  | 1450 | 18 | 1574 | 33 | 1744 | 82 |
| LX065-39 | 26.73 | 112.28 |  | 0.24 | 11.15948 | 0.14786 | 0.49212 | 0.00551 | 0.16443 | 0.0021 |  | 2580 | 24 | 2537 | 12 | 2502 | 10 |
| LX065-40 | 33.8 | 153.59 |  | 0.22 | 9.74779 | 0.12798 | 0.44336 | 0.00495 | 0.15943 | 0.00202 |  | 2366 | 22 | 2411 | 12 | 2450 | 10 |
| LX065-41 | 76.68 | 94.71 |  | 0.81 | 11.48363 | 0.15217 | 0.48872 | 0.00547 | 0.17039 | 0.00218 |  | 2565 | 24 | 2563 | 12 | 2561 | 10 |
| LX065-42 | 208.66 | 139.17 |  | 1.50 | 10.44664 | 0.1362 | 0.46784 | 0.00521 | 0.16191 | 0.00203 |  | 2474 | 23 | 2475 | 12 | 2476 | 10 |
| LX065-43 | 141.06 | 279.36 |  | 0.50 | 10.72529 | 0.13693 | 0.46828 | 0.00518 | 0.16608 | 0.00203 |  | 2476 | 23 | 2500 | 12 | 2519 | 10 |
| LX065-44 | 121.11 | 148.27 |  | 0.82 | 8.46127 | 0.16736 | 0.41116 | 0.00498 | 0.14925 | 0.00346 |  | 2220 | 23 | 2282 | 18 | 2337 | 41 |
| LX065-45 | 70.36 | 96.91 |  | 0.73 | 13.72878 | 0.18304 | 0.52335 | 0.00589 | 0.19022 | 0.00245 |  | 2713 | 25 | 2731 | 13 | 2744 | 10 |
| LX065-46 | 233.02 | 238.01 |  | 0.98 | 12.55121 | 0.16248 | 0.5269 | 0.00586 | 0.17273 | 0.00215 |  | 2728 | 25 | 2647 | 12 | 2584 | 10 |
| LX065-47 | 70.41 | 214.74 |  | 0.33 | 13.81418 | 0.17689 | 0.52803 | 0.00585 | 0.1897 | 0.00233 |  | 2733 | 25 | 2737 | 12 | 2740 | 9 |
| LX065-48 | 23.9 | 131.28 |  | 0.18 | 10.79095 | 0.14264 | 0.47498 | 0.00531 | 0.16474 | 0.0021 |  | 2505 | 23 | 2505 | 12 | 2505 | 10 |
| LX065-49 | 99.11 | 200.12 |  | 0.50 | 6.32071 | 0.08485 | 0.36816 | 0.00411 | 0.12449 | 0.00161 |  | 2021 | 19 | 2021 | 12 | 2022 | 11 |
| LX065-50 | 98.96 | 259.59 |  | 0.38 | 8.30784 | 0.12946 | 0.39467 | 0.00449 | 0.15267 | 0.00294 |  | 2144 | 21 | 2265 | 14 | 2376 | 34 |
| LX065-51 | 62.69 | 156.23 |  | 0.40 | 10.12292 | 0.15182 | 0.43162 | 0.0049 | 0.1701 | 0.0032 |  | 2313 | 22 | 2446 | 14 | 2559 | 32 |
| LX065-52 | 123.75 | 537.87 |  | 0.23 | 11.97101 | 0.15183 | 0.47824 | 0.00528 | 0.18151 | 0.0022 |  | 2520 | 23 | 2602 | 12 | 2667 | 9 |
| LX065-53 | 71.99 | 287.13 |  | 0.25 | 10.96153 | 0.14154 | 0.47786 | 0.0053 | 0.16634 | 0.00206 |  | 2518 | 23 | 2520 | 12 | 2521 | 10 |
| LX065-54 | 33.37 | 902.64 |  | 0.04 | 6.90728 | 0.08406 | 0.32835 | 0.00352 | 0.15257 | 0.00248 |  | 1830 | 17 | 2100 | 11 | 2375 | 28 |
| LX065-55 | 41.47 | 276.98 |  | 0.15 | 8.59338 | 0.11326 | 0.39302 | 0.0043 | 0.15858 | 0.00272 |  | 2137 | 20 | 2296 | 12 | 2441 | 30 |
| LX065-56 | 42.71 | 121.93 |  | 0.35 | 12.51042 | 0.16603 | 0.4896 | 0.00548 | 0.18529 | 0.00237 |  | 2569 | 24 | 2644 | 12 | 2701 | 10 |
| LX065-57 | 50.28 | 54.15 |  | 0.93 | 12.497 | 0.17465 | 0.50685 | 0.00577 | 0.17879 | 0.00243 |  | 2643 | 25 | 2643 | 13 | 2642 | 11 |
| LX065-58 | 100.76 | 99.43 |  | 1.01 | 10.14728 | 0.13839 | 0.46052 | 0.00518 | 0.15978 | 0.00211 |  | 2442 | 23 | 2448 | 13 | 2453 | 10 |
| LX065-59 | 179.71 | 117.07 |  | 1.54 | 10.167 | 0.13869 | 0.46247 | 0.00521 | 0.15941 | 0.0021 |  | 2450 | 23 | 2450 | 13 | 2449 | 10 |
| LX065-60 | 123.52 | 247.77 |  | 0.50 | 10.35316 | 0.13455 | 0.46532 | 0.00516 | 0.16134 | 0.00201 |  | 2463 | 23 | 2467 | 12 | 2470 | 10 |
| LX065-61 | 141.32 | 207.91 |  | 0.68 | 25.76314 | 0.33244 | 0.67411 | 0.00749 | 0.27713 | 0.00343 |  | 3322 | 29 | 3338 | 13 | 3347 | 9 |
| LX065-62 | 118.84 | 231.37 |  | 0.51 | 5.04867 | 0.06824 | 0.32788 | 0.00365 | 0.11165 | 0.00146 |  | 1828 | 18 | 1828 | 11 | 1826 | 11 |
| LX065-63 | 133.97 | 370.37 |  | 0.36 | 11.63473 | 0.15089 | 0.49194 | 0.00545 | 0.1715 | 0.00213 |  | 2579 | 24 | 2575 | 12 | 2572 | 10 |
| LX065-64 | 72.67 | 129.1 |  | 0.56 | 9.34892 | 0.12546 | 0.42161 | 0.00472 | 0.16079 | 0.00208 |  | 2268 | 21 | 2373 | 12 | 2464 | 10 |
| LX065-65 | 109.23 | 132.93 |  | 0.82 | 10.70546 | 0.14492 | 0.47328 | 0.00531 | 0.16402 | 0.00214 |  | 2498 | 23 | 2498 | 13 | 2498 | 10 |
| LX065-66 | 84.75 | 369.76 |  | 0.23 | 9.9592 | 0.12986 | 0.44777 | 0.00496 | 0.16128 | 0.00202 |  | 2385 | 22 | 2431 | 12 | 2469 | 10 |
| LX065-67 | 296.77 | 263.74 |  | 1.13 | 10.35101 | 0.13521 | 0.46585 | 0.00517 | 0.16112 | 0.00202 |  | 2465 | 23 | 2467 | 12 | 2467 | 10 |
| LX065-68 | 498.31 | 427.81 |  | 1.16 | 10.89287 | 0.14156 | 0.47644 | 0.00528 | 0.16579 | 0.00207 |  | 2512 | 23 | 2514 | 12 | 2516 | 10 |
| LX065-69 | 123.98 | 450.64 |  | 0.28 | 7.87323 | 0.11277 | 0.37557 | 0.00418 | 0.15204 | 0.00276 |  | 2056 | 20 | 2217 | 13 | 2369 | 32 |
| LX065-70 | 57.27 | 179.04 |  | 0.32 | 13.94392 | 0.18663 | 0.54271 | 0.00608 | 0.18631 | 0.0024 |  | 2795 | 25 | 2746 | 13 | 2710 | 10 |
| LX065-71 | 101.01 | 181.98 |  | 0.56 | 14.89071 | 0.19613 | 0.54529 | 0.00607 | 0.19802 | 0.00251 |  | 2806 | 25 | 2808 | 13 | 2810 | 10 |
| LX065-72 | 25.21 | 57.84 |  | 0.44 | 7.76402 | 0.12157 | 0.40633 | 0.00473 | 0.13856 | 0.00214 |  | 2198 | 22 | 2204 | 14 | 2209 | 13 |
| LX065-73 | 18.69 | 582.4 |  | 0.03 | 9.1083 | 0.11371 | 0.41081 | 0.00443 | 0.1608 | 0.00265 |  | 2219 | 20 | 2349 | 11 | 2464 | 29 |
| LX065-74 | 51.71 | 38.36 |  | 1.35 | 5.44801 | 0.09682 | 0.34125 | 0.00407 | 0.11577 | 0.00205 |  | 1893 | 20 | 1892 | 15 | 1892 | 16 |
| LX065-75 | 51.9 | 122.99 |  | 0.42 | 10.64785 | 0.14471 | 0.47177 | 0.00529 | 0.16366 | 0.00215 |  | 2491 | 23 | 2493 | 13 | 2494 | 10 |
| LX065-76 | 148.86 | 309.43 |  | 0.48 | 7.46974 | 0.09946 | 0.36955 | 0.00411 | 0.14657 | 0.00188 |  | 2027 | 19 | 2169 | 12 | 2306 | 10 |
| LX065-77 | 204.29 | 282.59 |  | 0.72 | 13.66657 | 0.17939 | 0.53144 | 0.0059 | 0.18648 | 0.00235 |  | 2748 | 25 | 2727 | 12 | 2711 | 10 |
| LX065-78 | 258.16 | 182.48 |  | 1.41 | 10.58283 | 0.14298 | 0.45785 | 0.00512 | 0.16761 | 0.00218 |  | 2430 | 23 | 2487 | 13 | 2534 | 10 |
| LX065-79 | 278.12 | 418.02 |  | 0.67 | 12.21552 | 0.16082 | 0.5297 | 0.00588 | 0.16723 | 0.00211 |  | 2740 | 25 | 2621 | 12 | 2530 | 10 |
| LX065-80 | 49.2 | 79.21 |  | 0.62 | 8.43992 | 0.15853 | 0.39403 | 0.00473 | 0.15535 | 0.00346 |  | 2141 | 22 | 2279 | 17 | 2406 | 39 |
| LX065-81 | 69.49 | 222.52 |  | 0.31 | 10.34333 | 0.14006 | 0.45631 | 0.0051 | 0.16437 | 0.00215 |  | 2423 | 23 | 2466 | 13 | 2501 | 10 |
| LX065-82 | 89.23 | 288.2 |  | 0.31 | 9.40431 | 0.1268 | 0.44034 | 0.00491 | 0.15487 | 0.00201 |  | 2352 | 22 | 2378 | 12 | 2400 | 10 |
| LX065-83 | 126.2 | 226.21 |  | 0.56 | 15.28856 | 0.20356 | 0.55142 | 0.00614 | 0.20105 | 0.00257 |  | 2831 | 26 | 2833 | 13 | 2835 | 10 |
| LX065-84 | 137.97 | 314.29 |  | 0.44 | 10.48108 | 0.17417 | 0.43524 | 0.00505 | 0.17465 | 0.00354 |  | 2329 | 23 | 2478 | 15 | 2603 | 35 |
| LX065-85 | 68.55 | 125.39 |  | 0.55 | 15.32488 | 0.20906 | 0.55183 | 0.0062 | 0.20138 | 0.00265 |  | 2833 | 26 | 2836 | 13 | 2837 | 10 |
| LX065-86 | 73.96 | 117.98 |  | 0.63 | 12.38839 | 0.17021 | 0.50507 | 0.00568 | 0.17786 | 0.00236 |  | 2636 | 24 | 2634 | 13 | 2633 | 10 |
| LX065-87 | 144.69 | 226.04 |  | 0.64 | 10.56914 | 0.14198 | 0.47021 | 0.00524 | 0.16299 | 0.00211 |  | 2484 | 23 | 2486 | 12 | 2487 | 10 |
| LX065-88 | 160.05 | 290.02 |  | 0.55 | 10.2897 | 0.13806 | 0.46577 | 0.00518 | 0.1602 | 0.00207 |  | 2465 | 23 | 2461 | 12 | 2458 | 10 |
| LX065-89 | 54.51 | 51.73 |  | 1.05 | 10.77783 | 0.16318 | 0.47398 | 0.0055 | 0.16489 | 0.00245 |  | 2501 | 24 | 2504 | 14 | 2506 | 12 |
| LX065-90 | 159.89 | 136.03 |  | 1.18 | 10.09831 | 0.13923 | 0.46115 | 0.00517 | 0.15879 | 0.00212 |  | 2445 | 23 | 2444 | 13 | 2443 | 11 |
| LX065-91 | 51.51 | 422.26 |  | 0.12 | 10.91024 | 0.14565 | 0.47753 | 0.0053 | 0.16567 | 0.00213 |  | 2516 | 23 | 2516 | 12 | 2514 | 10 |
| LX065-92 | 217.39 | 297.63 |  | 0.73 | 14.33067 | 0.1924 | 0.53189 | 0.00592 | 0.19537 | 0.00252 |  | 2749 | 25 | 2772 | 13 | 2788 | 10 |
| LX065-93 | 20.5 | 87.24 |  | 0.23 | 12.45991 | 0.17664 | 0.50598 | 0.00574 | 0.17857 | 0.00246 |  | 2639 | 25 | 2640 | 13 | 2640 | 11 |
| LX065-94 | 383.88 | 407.67 |  | 0.94 | 12.21983 | 0.16416 | 0.50118 | 0.00558 | 0.1768 | 0.00228 |  | 2619 | 24 | 2621 | 13 | 2623 | 10 |
| LX065-95 | 117.6 | 220.03 |  | 0.53 | 13.40588 | 0.18201 | 0.52329 | 0.00584 | 0.18577 | 0.00243 |  | 2713 | 25 | 2709 | 13 | 2705 | 10 |
| LX03-2 (marble) | | | | | | | | | | | | | | | | | |
| LX032-01 | 65.07 | 78.75 |  | 0.83 | 10.90216 | 0.16996 | 0.4766 | 0.0071 | 0.16594 | 0.00204 |  | 2513 | 31 | 2515 | 15 | 2517 | 21 |
| LX032-02 | 212.32 | 550.67 |  | 0.39 | 13.13642 | 0.18845 | 0.51756 | 0.00743 | 0.18413 | 0.00194 |  | 2689 | 32 | 2690 | 14 | 2690 | 17 |
| LX032-03 | 1168.98 | 1232.42 |  | 0.95 | 4.29816 | 0.06251 | 0.23942 | 0.00343 | 0.13023 | 0.00142 |  | 1384 | 18 | 1693 | 12 | 2101 | 19 |
| LX032-04 | 389.52 | 386 |  | 1.01 | 5.80134 | 0.08409 | 0.35235 | 0.00504 | 0.11944 | 0.00129 |  | 1946 | 24 | 1947 | 13 | 1948 | 19 |
| LX032-05 | 83.2 | 148.94 |  | 0.56 | 10.58492 | 0.15771 | 0.47109 | 0.00686 | 0.163 | 0.00185 |  | 2488 | 30 | 2487 | 14 | 2487 | 19 |
| LX032-06 | 45.67 | 561.97 |  | 0.08 | 9.30948 | 0.13369 | 0.44343 | 0.00635 | 0.1523 | 0.00161 |  | 2366 | 28 | 2369 | 13 | 2372 | 18 |
| LX032-07 | 8.65 | 37.79 |  | 0.23 | 12.63989 | 0.23424 | 0.53799 | 0.00879 | 0.17044 | 0.00273 |  | 2775 | 37 | 2653 | 17 | 2562 | 27 |
| LX032-09 | 89.31 | 109.74 |  | 0.81 | 10.50845 | 0.16221 | 0.47037 | 0.00696 | 0.16207 | 0.00196 |  | 2485 | 31 | 2481 | 14 | 2477 | 20 |
| LX032-10 | 0.814 | 177.52 |  | 0.00 | 6.46054 | 0.09744 | 0.37337 | 0.00542 | 0.12553 | 0.00146 |  | 2045 | 25 | 2041 | 13 | 2036 | 20 |
| LX032-11 | 116.63 | 127.58 |  | 0.91 | 5.2032 | 0.08594 | 0.33727 | 0.00503 | 0.11192 | 0.00152 |  | 1874 | 24 | 1853 | 14 | 1831 | 24 |
| LX032-12 | 137.22 | 680.56 |  | 0.20 | 2.50504 | 0.03854 | 0.19292 | 0.00279 | 0.0942 | 0.00114 |  | 1137 | 15 | 1274 | 11 | 1512 | 23 |
| LX032-13 | 181.4 | 291.6 |  | 0.62 | 9.68612 | 0.14113 | 0.41794 | 0.00603 | 0.16813 | 0.00183 |  | 2251 | 27 | 2405 | 13 | 2539 | 18 |
| LX032-14 | 43.67 | 205.93 |  | 0.21 | 26.8228 | 0.38885 | 0.67526 | 0.00983 | 0.28818 | 0.00309 |  | 3326 | 38 | 3377 | 14 | 3408 | 17 |
| LX032-15 | 54.68 | 162.64 |  | 0.34 | 13.77575 | 0.20165 | 0.52555 | 0.00762 | 0.19016 | 0.00209 |  | 2723 | 32 | 2734 | 14 | 2744 | 18 |
| LX032-16 | 151.52 | 398.76 |  | 0.38 | 9.65023 | 0.14209 | 0.4474 | 0.00648 | 0.15648 | 0.00174 |  | 2384 | 29 | 2402 | 14 | 2418 | 19 |
| LX032-17 | 75.18 | 156.87 |  | 0.48 | 8.91099 | 0.14152 | 0.43039 | 0.00643 | 0.15021 | 0.00191 |  | 2308 | 29 | 2329 | 15 | 2348 | 22 |
| LX032-18 | 95.7 | 82.69 |  | 1.16 | 10.56785 | 0.16677 | 0.47081 | 0.00704 | 0.16285 | 0.00205 |  | 2487 | 31 | 2486 | 15 | 2485 | 21 |
| LX032-19 | 72.43 | 71.05 |  | 1.02 | 7.11219 | 0.12014 | 0.38982 | 0.00593 | 0.13236 | 0.00187 |  | 2122 | 27 | 2126 | 15 | 2130 | 25 |
| LX032-20 | 282.24 | 771.08 |  | 0.37 | 1.34564 | 0.021 | 0.13377 | 0.00193 | 0.07298 | 0.00091 |  | 809 | 11 | 866 | 9 | 1013 | 25 |
| LX032-21 | 130.12 | 301.99 |  | 0.43 | 14.45569 | 0.20648 | 0.53559 | 0.00767 | 0.19581 | 0.00205 |  | 2765 | 32 | 2780 | 14 | 2792 | 17 |
| LX032-22 | 133.63 | 716.67 |  | 0.19 | 9.34915 | 0.13352 | 0.43022 | 0.00615 | 0.15766 | 0.00165 |  | 2307 | 28 | 2373 | 13 | 2431 | 18 |
| LX032-23 | 146.25 | 170.96 |  | 0.86 | 10.43952 | 0.16395 | 0.46671 | 0.00697 | 0.16228 | 0.00203 |  | 2469 | 31 | 2475 | 15 | 2480 | 21 |
| LX032-24 | 4.42 | 371.55 |  | 0.01 | 5.99212 | 0.08786 | 0.35702 | 0.00513 | 0.12177 | 0.00135 |  | 1968 | 24 | 1975 | 13 | 1982 | 20 |
| LX032-25 | 414.49 | 306.37 |  | 1.35 | 10.98028 | 0.15964 | 0.46462 | 0.0067 | 0.17146 | 0.00186 |  | 2460 | 29 | 2522 | 14 | 2572 | 18 |
| LX032-26 | 26.65 | 168.16 |  | 0.16 | 1.75943 | 0.03546 | 0.14632 | 0.00225 | 0.08724 | 0.0016 |  | 880 | 13 | 1031 | 13 | 1366 | 35 |
| LX032-27 | 95.88 | 182.76 |  | 0.52 | 3.16787 | 0.05835 | 0.25466 | 0.00387 | 0.09025 | 0.00145 |  | 1462 | 20 | 1449 | 14 | 1431 | 30 |
| LX032-28 | 36.88 | 193.57 |  | 0.19 | 5.09366 | 0.08626 | 0.25567 | 0.00389 | 0.14455 | 0.00208 |  | 1468 | 20 | 1835 | 14 | 2282 | 25 |
| LX032-29 | 704.28 | 749.13 |  | 0.94 | 6.18632 | 0.08833 | 0.33632 | 0.00479 | 0.13346 | 0.0014 |  | 1869 | 23 | 2003 | 12 | 2144 | 18 |
| LX032-30 | 71.64 | 129.69 |  | 0.55 | 6.83 | 0.11444 | 0.38281 | 0.0058 | 0.12945 | 0.00181 |  | 2089 | 27 | 2090 | 15 | 2091 | 24 |
| LX032-31 | 185.07 | 548.89 |  | 0.34 | 5.94731 | 0.08502 | 0.35583 | 0.00507 | 0.12127 | 0.00128 |  | 1962 | 24 | 1968 | 12 | 1975 | 19 |
| LX032-32 | 158.19 | 366.03 |  | 0.43 | 10.73483 | 0.15387 | 0.47389 | 0.00678 | 0.16435 | 0.00174 |  | 2501 | 30 | 2500 | 13 | 2501 | 18 |
| LX032-33 | 29.32 | 503.87 |  | 0.06 | 6.05415 | 0.08841 | 0.36141 | 0.00518 | 0.12154 | 0.00133 |  | 1989 | 25 | 1984 | 13 | 1979 | 19 |
| LX032-34 | 112.33 | 282.48 |  | 0.40 | 11.10707 | 0.16297 | 0.47642 | 0.0069 | 0.16915 | 0.00187 |  | 2512 | 30 | 2532 | 14 | 2549 | 18 |
| LX032-35 | 122.61 | 269.91 |  | 0.45 | 6.42012 | 0.0991 | 0.37952 | 0.00555 | 0.12274 | 0.00149 |  | 2074 | 26 | 2035 | 14 | 1996 | 21 |
| LX032-36 | 23.53 | 41.12 |  | 0.57 | 11.1233 | 0.20924 | 0.48008 | 0.00785 | 0.16811 | 0.00278 |  | 2528 | 34 | 2534 | 18 | 2539 | 27 |
| LX032-37 | 90.76 | 428.81 |  | 0.21 | 3.93984 | 0.0596 | 0.22298 | 0.00323 | 0.1282 | 0.00152 |  | 1298 | 17 | 1622 | 12 | 2073 | 21 |
| LX032-38 | 21.06 | 49.77 |  | 0.42 | 3.20983 | 0.07511 | 0.25432 | 0.00418 | 0.09157 | 0.00202 |  | 1461 | 22 | 1460 | 18 | 1458 | 42 |
| LX032-39 | 191.79 | 280.74 |  | 0.68 | 10.61341 | 0.15931 | 0.46949 | 0.00686 | 0.16402 | 0.0019 |  | 2481 | 30 | 2490 | 14 | 2498 | 19 |
| LX032-40 | 79.9 | 90.16 |  | 0.89 | 10.33043 | 0.16525 | 0.46971 | 0.00707 | 0.15958 | 0.00206 |  | 2482 | 31 | 2465 | 15 | 2451 | 22 |
| LX032-41 | 31.38 | 72.45 |  | 0.43 | 3.20772 | 0.07017 | 0.25355 | 0.00408 | 0.09179 | 0.00187 |  | 1457 | 21 | 1459 | 17 | 1463 | 38 |
| LX032-42 | 98.19 | 429.45 |  | 0.23 | 10.1171 | 0.1443 | 0.43114 | 0.00616 | 0.17026 | 0.00179 |  | 2311 | 28 | 2446 | 13 | 2560 | 17 |
| LX032-43 | 137.11 | 249.79 |  | 0.55 | 5.92615 | 0.09038 | 0.35882 | 0.00522 | 0.11984 | 0.00143 |  | 1977 | 25 | 1965 | 13 | 1954 | 21 |
| LX032-44 | 121.5 | 269.3 |  | 0.45 | 5.64802 | 0.08404 | 0.34957 | 0.00504 | 0.11723 | 0.00134 |  | 1933 | 24 | 1924 | 13 | 1915 | 20 |
| LX032-45 | 20.41 | 152.92 |  | 0.13 | 4.8785 | 0.08047 | 0.26767 | 0.00401 | 0.13224 | 0.00182 |  | 1529 | 20 | 1799 | 14 | 2128 | 24 |
| LX032-46 | 32.92 | 83.86 |  | 0.39 | 3.84603 | 0.07712 | 0.28261 | 0.00445 | 0.09874 | 0.00179 |  | 1605 | 22 | 1602 | 16 | 1601 | 33 |
| LX032-47 | 247.43 | 422.59 |  | 0.59 | 3.21025 | 0.04834 | 0.25426 | 0.00366 | 0.09161 | 0.00107 |  | 1460 | 19 | 1460 | 12 | 1459 | 22 |
| LX032-48 | 49.42 | 77.82 |  | 0.64 | 9.38431 | 0.1566 | 0.44412 | 0.00678 | 0.15332 | 0.00213 |  | 2369 | 30 | 2376 | 15 | 2383 | 23 |
| LX032-49 | 183.22 | 142.68 |  | 1.28 | 10.36174 | 0.16088 | 0.46504 | 0.00691 | 0.16167 | 0.00199 |  | 2462 | 30 | 2468 | 14 | 2473 | 21 |
| LX032-50 | 451.22 | 514.29 |  | 0.88 | 5.62742 | 0.08236 | 0.34433 | 0.00494 | 0.11859 | 0.00131 |  | 1908 | 24 | 1920 | 13 | 1935 | 20 |
| LX032-51 | 261.97 | 493.04 |  | 0.53 | 3.3455 | 0.05193 | 0.25394 | 0.00368 | 0.09559 | 0.00118 |  | 1459 | 19 | 1492 | 12 | 1540 | 23 |
| LX032-52 | 192.52 | 272.22 |  | 0.71 | 14.25765 | 0.20419 | 0.53534 | 0.00768 | 0.19325 | 0.00204 |  | 2764 | 32 | 2767 | 14 | 2770 | 17 |
| LX032-53 | 39.83 | 253.45 |  | 0.16 | 5.87514 | 0.09125 | 0.34644 | 0.00507 | 0.12305 | 0.00152 |  | 1918 | 24 | 1958 | 13 | 2001 | 22 |
| LX032-54 | 177.81 | 220.21 |  | 0.81 | 6.3558 | 0.0987 | 0.36627 | 0.00537 | 0.12591 | 0.00155 |  | 2012 | 25 | 2026 | 14 | 2042 | 22 |
| LX032-55 | 510.48 | 322 |  | 1.59 | 3.10073 | 0.04925 | 0.24755 | 0.00361 | 0.09089 | 0.00117 |  | 1426 | 19 | 1433 | 12 | 1444 | 24 |
| LX032-56 | 100.34 | 666.99 |  | 0.15 | 5.32197 | 0.07638 | 0.33838 | 0.00482 | 0.11412 | 0.00122 |  | 1879 | 23 | 1872 | 12 | 1866 | 19 |
| LX032-57 | 150.24 | 188.35 |  | 0.80 | 10.79956 | 0.16157 | 0.47891 | 0.00699 | 0.16363 | 0.00188 |  | 2523 | 30 | 2506 | 14 | 2494 | 19 |
| LX032-58 | 58.42 | 90.06 |  | 0.65 | 10.91193 | 0.18491 | 0.47635 | 0.00738 | 0.16622 | 0.00236 |  | 2511 | 32 | 2516 | 16 | 2520 | 24 |
| LX032-59 | 200.75 | 289.96 |  | 0.69 | 10.84917 | 0.15705 | 0.47856 | 0.00688 | 0.1645 | 0.00178 |  | 2521 | 30 | 2510 | 13 | 2503 | 18 |
| LX032-60 | 114.8 | 132.56 |  | 0.87 | 3.12876 | 0.05715 | 0.24961 | 0.00379 | 0.09095 | 0.00145 |  | 1437 | 20 | 1440 | 14 | 1446 | 30 |
| LX032-61 | 131.49 | 161.42 |  | 0.81 | 10.43677 | 0.15739 | 0.46877 | 0.00686 | 0.16156 | 0.00189 |  | 2478 | 30 | 2474 | 14 | 2472 | 20 |
| LX032-62 | 159.53 | 328.53 |  | 0.49 | 13.29155 | 0.19001 | 0.52068 | 0.00746 | 0.18524 | 0.00196 |  | 2702 | 32 | 2701 | 14 | 2700 | 17 |
| LX032-63 | 20.54 | 145.31 |  | 0.14 | 16.07777 | 0.24632 | 0.56412 | 0.00842 | 0.20681 | 0.00248 |  | 2884 | 35 | 2881 | 15 | 2881 | 19 |
| LX032-64 | 253.16 | 452.66 |  | 0.56 | 13.29952 | 0.18806 | 0.52425 | 0.00747 | 0.18409 | 0.0019 |  | 2717 | 32 | 2701 | 13 | 2690 | 17 |
| LX032-65 | 114.42 | 224.21 |  | 0.51 | 12.39261 | 0.18161 | 0.50344 | 0.00729 | 0.17863 | 0.00198 |  | 2629 | 31 | 2635 | 14 | 2640 | 18 |
| LX032-66 | 92.41 | 147.12 |  | 0.63 | 4.60478 | 0.07867 | 0.28421 | 0.00429 | 0.11757 | 0.00171 |  | 1613 | 22 | 1750 | 14 | 1920 | 26 |
| LX032-67 | 58.86 | 192.79 |  | 0.31 | 8.43593 | 0.1305 | 0.42334 | 0.00624 | 0.1446 | 0.00177 |  | 2276 | 28 | 2279 | 14 | 2283 | 21 |
| LX032-68 | 483.52 | 263.81 |  | 1.83 | 5.00572 | 0.07661 | 0.32626 | 0.00474 | 0.11134 | 0.00134 |  | 1820 | 23 | 1820 | 13 | 1821 | 22 |
| LX032-69 | 9.24 | 196.61 |  | 0.05 | 10.07947 | 0.15097 | 0.46 | 0.00671 | 0.15901 | 0.00184 |  | 2440 | 30 | 2442 | 14 | 2445 | 19 |
| LX032-70 | 6.34 | 116.69 |  | 0.05 | 5.56524 | 0.09264 | 0.34596 | 0.00517 | 0.11673 | 0.00162 |  | 1915 | 25 | 1911 | 14 | 1907 | 25 |
| LX032-71 | 58.42 | 479.41 |  | 0.12 | 5.6701 | 0.08227 | 0.34767 | 0.00497 | 0.11835 | 0.00129 |  | 1924 | 24 | 1927 | 13 | 1931 | 19 |
| LX032-72 | 223.37 | 228.75 |  | 0.98 | 10.44672 | 0.15259 | 0.46768 | 0.00675 | 0.16209 | 0.00179 |  | 2473 | 30 | 2475 | 14 | 2478 | 19 |
| LX032-73 | 273.19 | 252.32 |  | 1.08 | 8.81147 | 0.13073 | 0.43138 | 0.00625 | 0.14823 | 0.00169 |  | 2312 | 28 | 2319 | 14 | 2326 | 19 |
| LX032-74 | 315.66 | 235.3 |  | 1.34 | 5.81638 | 0.08803 | 0.35491 | 0.00515 | 0.11893 | 0.00141 |  | 1958 | 24 | 1949 | 13 | 1940 | 21 |
| LX032-75 | 114.85 | 229.8 |  | 0.50 | 10.83992 | 0.15901 | 0.47501 | 0.00687 | 0.16561 | 0.00184 |  | 2506 | 30 | 2510 | 14 | 2514 | 19 |
| LX032-76 | 310.83 | 289.7 |  | 1.07 | 13.19504 | 0.19455 | 0.51874 | 0.00755 | 0.18459 | 0.00207 |  | 2694 | 32 | 2694 | 14 | 2695 | 18 |
| LX032-77 | 43 | 341.22 |  | 0.13 | 10.81788 | 0.1544 | 0.47606 | 0.0068 | 0.16491 | 0.00174 |  | 2510 | 30 | 2508 | 13 | 2507 | 18 |
| LX032-78 | 107.35 | 171.58 |  | 0.63 | 10.46297 | 0.16453 | 0.46957 | 0.00702 | 0.1617 | 0.00204 |  | 2482 | 31 | 2477 | 15 | 2474 | 21 |
| LX032-79 | 49.61 | 74.92 |  | 0.66 | 3.52024 | 0.07426 | 0.24053 | 0.00391 | 0.10621 | 0.00208 |  | 1389 | 20 | 1532 | 17 | 1735 | 35 |
| LX032-80 | 230.71 | 113.8 |  | 2.03 | 6.258 | 0.10445 | 0.36737 | 0.00553 | 0.12362 | 0.00172 |  | 2017 | 26 | 2013 | 15 | 2009 | 25 |
| LX032-81 | 155.18 | 734.5 |  | 0.21 | 1.12591 | 0.01802 | 0.12513 | 0.0018 | 0.0653 | 0.00085 |  | 760 | 10 | 766 | 9 | 784 | 27 |
| LX032-82 | 182.94 | 292.19 |  | 0.63 | 10.9551 | 0.15712 | 0.4738 | 0.00679 | 0.1678 | 0.00179 |  | 2500 | 30 | 2519 | 13 | 2536 | 18 |
| LX032-83 | 26.22 | 121.41 |  | 0.22 | 10.14892 | 0.16302 | 0.44996 | 0.00679 | 0.16368 | 0.00214 |  | 2395 | 30 | 2448 | 15 | 2494 | 22 |
| LX032-84 | 225.4 | 957.64 |  | 0.24 | 1.20346 | 0.01881 | 0.13451 | 0.00193 | 0.06493 | 0.00081 |  | 814 | 11 | 802 | 9 | 772 | 26 |
| LX032-85 | 175.61 | 326.96 |  | 0.54 | 10.26794 | 0.14665 | 0.46524 | 0.00665 | 0.16017 | 0.0017 |  | 2463 | 29 | 2459 | 13 | 2457 | 18 |
| LX032-86 | 67.17 | 130.24 |  | 0.52 | 7.20329 | 0.11445 | 0.3905 | 0.0058 | 0.13387 | 0.00172 |  | 2125 | 27 | 2137 | 14 | 2149 | 22 |
| LX032-87 | 131.68 | 164.76 |  | 0.80 | 10.43239 | 0.16451 | 0.46854 | 0.00701 | 0.16159 | 0.00205 |  | 2477 | 31 | 2474 | 15 | 2472 | 21 |
| LX032-88 | 104.96 | 93.37 |  | 1.12 | 1.05411 | 0.03473 | 0.12001 | 0.00207 | 0.06375 | 0.00208 |  | 731 | 12 | 731 | 17 | 733 | 68 |
| LX032-89 | 354.23 | 570.47 |  | 0.62 | 10.96383 | 0.15422 | 0.47972 | 0.00681 | 0.16586 | 0.0017 |  | 2526 | 30 | 2520 | 13 | 2516 | 17 |
| LX032-90 | 160.45 | 543.62 |  | 0.30 | 10.51473 | 0.14791 | 0.47006 | 0.00667 | 0.16234 | 0.00167 |  | 2484 | 29 | 2481 | 13 | 2480 | 17 |
| LX032-91 | 396.94 | 330.04 |  | 1.20 | 5.12325 | 0.07478 | 0.32899 | 0.00471 | 0.11302 | 0.00125 |  | 1834 | 23 | 1840 | 12 | 1849 | 20 |
| LX032-92 | 55.1 | 287.26 |  | 0.19 | 11.44031 | 0.16983 | 0.48505 | 0.00696 | 0.17117 | 0.00194 |  | 2549 | 30 | 2560 | 14 | 2569 | 19 |
| LX032-93 | 225.33 | 528.06 |  | 0.43 | 9.03559 | 0.1287 | 0.43429 | 0.00619 | 0.15099 | 0.00159 |  | 2325 | 28 | 2342 | 13 | 2357 | 18 |
| LX032-94 | 189.34 | 196.81 |  | 0.96 | 2.91835 | 0.04684 | 0.24018 | 0.0035 | 0.08818 | 0.00116 |  | 1388 | 18 | 1387 | 12 | 1387 | 25 |
| LX032-95 | 13.83 | 605.85 |  | 0.02 | 5.13414 | 0.07275 | 0.33028 | 0.00468 | 0.11281 | 0.00118 |  | 1840 | 23 | 1842 | 12 | 1845 | 19 |
| LX032-96 | 68.85 | 92.2 |  | 0.75 | 5.09485 | 0.0844 | 0.33102 | 0.00492 | 0.1117 | 0.00154 |  | 1843 | 24 | 1835 | 14 | 1827 | 25 |
| LX032-97 | 332.27 | 483.15 |  | 0.69 | 2.61321 | 0.04055 | 0.21318 | 0.00308 | 0.08896 | 0.00111 |  | 1246 | 16 | 1304 | 11 | 1403 | 24 |
| LX032-98 | 68.19 | 136.53 |  | 0.50 | 7.04457 | 0.10638 | 0.38873 | 0.00565 | 0.13152 | 0.00155 |  | 2117 | 26 | 2117 | 13 | 2118 | 21 |
| LX032-99 | 105.41 | 214.74 |  | 0.49 | 7.51375 | 0.11832 | 0.39966 | 0.00592 | 0.13644 | 0.00173 |  | 2168 | 27 | 2175 | 14 | 2183 | 22 |
| LX032-100 | 39.85 | 341.48 |  | 0.12 | 10.85779 | 0.15533 | 0.47689 | 0.00682 | 0.16524 | 0.00176 |  | 2514 | 30 | 2511 | 13 | 2510 | 18 |
| LX032-101 | 28.86 | 208.35 |  | 0.14 | 10.73237 | 0.16554 | 0.47275 | 0.00701 | 0.16476 | 0.00202 |  | 2496 | 31 | 2500 | 14 | 2505 | 20 |
| LX032-102 | 178.08 | 275.7 |  | 0.65 | 5.00837 | 0.07419 | 0.32579 | 0.00468 | 0.11157 | 0.00127 |  | 1818 | 23 | 1821 | 13 | 1825 | 21 |
| LX032-103 | 223.9 | 424.7 |  | 0.53 | 3.01819 | 0.04626 | 0.2463 | 0.00355 | 0.08894 | 0.00108 |  | 1419 | 18 | 1412 | 12 | 1403 | 23 |
| LX032-104 | 180.83 | 184.68 |  | 0.98 | 5.43176 | 0.08315 | 0.34108 | 0.00495 | 0.11558 | 0.0014 |  | 1892 | 24 | 1890 | 13 | 1889 | 22 |
| LX032-105 | 150.21 | 299.18 |  | 0.50 | 8.07796 | 0.11786 | 0.38173 | 0.00549 | 0.15359 | 0.00171 |  | 2084 | 26 | 2240 | 13 | 2386 | 19 |
| LX032-106 | 11.22 | 368.1 |  | 0.03 | 5.08918 | 0.0755 | 0.3238 | 0.00466 | 0.11407 | 0.00131 |  | 1808 | 23 | 1834 | 13 | 1865 | 21 |
| LX032-107 | 28.49 | 460.21 |  | 0.06 | 2.31857 | 0.03528 | 0.19125 | 0.00274 | 0.08799 | 0.00106 |  | 1128 | 15 | 1218 | 11 | 1382 | 23 |
| LX032-108 | 232.18 | 241.18 |  | 0.96 | 6.16043 | 0.09373 | 0.36335 | 0.00528 | 0.12305 | 0.00148 |  | 1998 | 25 | 1999 | 13 | 2001 | 21 |
| LX032-109 | 81.96 | 399.89 |  | 0.20 | 2.46293 | 0.03857 | 0.20596 | 0.00298 | 0.08679 | 0.0011 |  | 1207 | 16 | 1261 | 11 | 1356 | 24 |
| LX032-110 | 7.37 | 13.36 |  | 0.55 | 10.79689 | 0.33955 | 0.37308 | 0.00895 | 0.21004 | 0.00672 |  | 2044 | 42 | 2506 | 29 | 2906 | 51 |
| LX032-111 | 152.85 | 450.55 |  | 0.34 | 2.5817 | 0.0397 | 0.18412 | 0.00266 | 0.10177 | 0.00125 |  | 1089 | 14 | 1296 | 11 | 1657 | 23 |
| LX032-112 | 170.84 | 187.62 |  | 0.91 | 10.15138 | 0.15127 | 0.46223 | 0.00672 | 0.1594 | 0.00184 |  | 2449 | 30 | 2449 | 14 | 2449 | 19 |
| LX032-113 | 45.92 | 79.81 |  | 0.58 | 6.73609 | 0.11714 | 0.38108 | 0.00584 | 0.1283 | 0.00191 |  | 2081 | 27 | 2077 | 15 | 2075 | 26 |
| LX032-114 | 272.56 | 818.99 |  | 0.33 | 5.25118 | 0.07413 | 0.32838 | 0.00465 | 0.11607 | 0.00121 |  | 1831 | 23 | 1861 | 12 | 1897 | 19 |
| LX032-115 | 70.3 | 99.68 |  | 0.71 | 13.3634 | 0.20511 | 0.52268 | 0.00777 | 0.18557 | 0.00225 |  | 2711 | 33 | 2706 | 15 | 2703 | 20 |
| LX032-116 | 72.97 | 176.99 |  | 0.41 | 13.48075 | 0.19721 | 0.52211 | 0.00757 | 0.1874 | 0.00209 |  | 2708 | 32 | 2714 | 14 | 2720 | 18 |
| LX032-117 | 15.21 | 30.95 |  | 0.49 | 3.62464 | 0.09046 | 0.2331 | 0.00408 | 0.11286 | 0.00274 |  | 1351 | 21 | 1555 | 20 | 1846 | 43 |
| LX032-118 | 22.77 | 41.84 |  | 0.54 | 9.26483 | 0.16393 | 0.44242 | 0.00692 | 0.15199 | 0.00232 |  | 2362 | 31 | 2365 | 16 | 2369 | 26 |
| LX032-119 | 66.73 | 85.73 |  | 0.78 | 9.07833 | 0.15539 | 0.43515 | 0.00674 | 0.15142 | 0.0022 |  | 2329 | 30 | 2346 | 16 | 2362 | 25 |
| LX032-120 | 41.59 | 871.55 |  | 0.05 | 5.44473 | 0.07639 | 0.33976 | 0.0048 | 0.11632 | 0.0012 |  | 1886 | 23 | 1892 | 12 | 1900 | 18 |
| LX07-1 (marble) | | | | | | | | | | | | | | | | | |
| LX071-01 | 55.79 | 74.55 |  | 0.75 | 1.79477 | 0.04733 | 0.16827 | 0.0028 | 0.07737 | 0.00198 |  | 1003 | 15 | 1044 | 17 | 1131 | 50 |
| LX071-02 | 136.33 | 148.23 |  | 0.92 | 2.04257 | 0.03868 | 0.15247 | 0.00231 | 0.09717 | 0.00166 |  | 915 | 13 | 1130 | 13 | 1571 | 32 |
| LX071-03 | 41.48 | 63.06 |  | 0.66 | 1.89927 | 0.05322 | 0.16928 | 0.00285 | 0.08138 | 0.00223 |  | 1008 | 16 | 1081 | 19 | 1231 | 53 |
| LX071-04 | 196.18 | 265.91 |  | 0.74 | 1.70058 | 0.02951 | 0.16056 | 0.00234 | 0.07682 | 0.00115 |  | 960 | 13 | 1009 | 11 | 1117 | 29 |
| LX071-05 | 44.7 | 63.04 |  | 0.71 | 1.67043 | 0.04327 | 0.16786 | 0.00268 | 0.07218 | 0.0018 |  | 1000 | 15 | 997 | 16 | 991 | 50 |
| LX071-06 | 49.04 | 87 |  | 0.56 | 7.54446 | 0.1183 | 0.40169 | 0.00586 | 0.13623 | 0.00173 |  | 2177 | 27 | 2178 | 14 | 2180 | 22 |
| LX071-07 | 314.75 | 237.99 |  | 1.32 | 1.74959 | 0.03106 | 0.17016 | 0.00249 | 0.07458 | 0.00115 |  | 1013 | 14 | 1027 | 11 | 1057 | 31 |
| LX071-08 | 51.2 | 74.87 |  | 0.68 | 1.83165 | 0.04535 | 0.17244 | 0.00274 | 0.07705 | 0.00182 |  | 1026 | 15 | 1057 | 16 | 1122 | 46 |
| LX071-09 | 35.24 | 55.58 |  | 0.63 | 1.92283 | 0.06244 | 0.1774 | 0.00313 | 0.07862 | 0.00253 |  | 1053 | 17 | 1089 | 22 | 1163 | 63 |
| LX071-10 | 166.73 | 198.6 |  | 0.84 | 1.77886 | 0.0318 | 0.16503 | 0.00242 | 0.07819 | 0.00122 |  | 985 | 13 | 1038 | 12 | 1152 | 31 |
| LX071-11 | 158.92 | 150.33 |  | 1.06 | 1.79068 | 0.03615 | 0.17141 | 0.00258 | 0.07577 | 0.00139 |  | 1020 | 14 | 1042 | 13 | 1089 | 36 |
| LX071-12 | 155.68 | 223.32 |  | 0.70 | 1.78427 | 0.03122 | 0.17439 | 0.00254 | 0.07421 | 0.00112 |  | 1036 | 14 | 1040 | 11 | 1047 | 30 |
| LX071-13 | 29.19 | 51.44 |  | 0.57 | 1.76101 | 0.05151 | 0.17305 | 0.00293 | 0.07382 | 0.00212 |  | 1029 | 16 | 1031 | 19 | 1037 | 57 |
| LX071-14 | 300.7 | 300.95 |  | 1.00 | 1.68957 | 0.03051 | 0.16867 | 0.00247 | 0.07266 | 0.00115 |  | 1005 | 14 | 1005 | 12 | 1004 | 32 |
| LX071-15 | 28.31 | 220.79 |  | 0.13 | 5.39893 | 0.08116 | 0.33982 | 0.00484 | 0.11524 | 0.00136 |  | 1886 | 23 | 1885 | 13 | 1884 | 21 |
| LX071-16 | 67.11 | 84.18 |  | 0.80 | 1.76839 | 0.0425 | 0.16918 | 0.00268 | 0.07582 | 0.00174 |  | 1008 | 15 | 1034 | 16 | 1090 | 45 |
| LX071-17 | 60.16 | 86.99 |  | 0.69 | 1.74255 | 0.03796 | 0.17161 | 0.00262 | 0.07366 | 0.00149 |  | 1021 | 14 | 1024 | 14 | 1032 | 40 |
| LX071-18 | 85.87 | 112.53 |  | 0.76 | 1.78347 | 0.03743 | 0.17536 | 0.00264 | 0.07377 | 0.00142 |  | 1042 | 15 | 1039 | 14 | 1035 | 39 |
| LX071-19 | 53.47 | 102.65 |  | 0.52 | 1.86702 | 0.04511 | 0.17617 | 0.00281 | 0.07687 | 0.00177 |  | 1046 | 15 | 1070 | 16 | 1118 | 45 |
| LX071-20 | 56.99 | 80.55 |  | 0.71 | 2.33181 | 0.05197 | 0.13927 | 0.00228 | 0.12145 | 0.0026 |  | 841 | 13 | 1222 | 16 | 1978 | 38 |
| LX071-21 | 90.79 | 680.18 |  | 0.13 | 6.79979 | 0.09642 | 0.38012 | 0.00531 | 0.12976 | 0.00138 |  | 2077 | 25 | 2086 | 13 | 2095 | 19 |
| LX071-22 | 194.16 | 214.09 |  | 0.91 | 1.5721 | 0.02884 | 0.15549 | 0.00227 | 0.07334 | 0.00119 |  | 932 | 13 | 959 | 11 | 1023 | 32 |
| LX071-23 | 41.94 | 58.01 |  | 0.72 | 1.89055 | 0.05228 | 0.17009 | 0.00285 | 0.08063 | 0.00218 |  | 1013 | 16 | 1078 | 18 | 1213 | 52 |
| LX071-24 | 79.56 | 155.18 |  | 0.51 | 1.74595 | 0.03291 | 0.17154 | 0.00252 | 0.07383 | 0.00124 |  | 1021 | 14 | 1026 | 12 | 1037 | 34 |
| LX071-25 | 70.71 | 74.58 |  | 0.95 | 1.84675 | 0.0513 | 0.17208 | 0.00282 | 0.07785 | 0.0021 |  | 1024 | 16 | 1062 | 18 | 1143 | 53 |
| LX071-26 | 43.26 | 73.39 |  | 0.59 | 1.8332 | 0.05577 | 0.17584 | 0.00294 | 0.07563 | 0.00226 |  | 1044 | 16 | 1057 | 20 | 1085 | 59 |
| LX071-27 | 140.95 | 195.04 |  | 0.72 | 1.69964 | 0.03285 | 0.163 | 0.00242 | 0.07564 | 0.00132 |  | 973 | 13 | 1008 | 12 | 1086 | 35 |
| LX071-28 | 60.14 | 87.8 |  | 0.68 | 1.75788 | 0.04472 | 0.18089 | 0.00289 | 0.0705 | 0.00172 |  | 1072 | 16 | 1030 | 16 | 943 | 49 |
| LX071-29 | 70.77 | 115.43 |  | 0.61 | 2.03837 | 0.0437 | 0.16826 | 0.00262 | 0.08788 | 0.00176 |  | 1003 | 14 | 1128 | 15 | 1380 | 38 |
| LX071-30 | 65.84 | 95.67 |  | 0.69 | 1.69734 | 0.03683 | 0.16927 | 0.00257 | 0.07274 | 0.00147 |  | 1008 | 14 | 1008 | 14 | 1007 | 40 |
| LX071-31 | 89.37 | 119.97 |  | 0.74 | 1.77582 | 0.03684 | 0.17268 | 0.0026 | 0.0746 | 0.00142 |  | 1027 | 14 | 1037 | 13 | 1058 | 38 |
| LX071-32 | 70.38 | 86.92 |  | 0.81 | 1.7306 | 0.04054 | 0.17038 | 0.00261 | 0.07369 | 0.00163 |  | 1014 | 14 | 1020 | 15 | 1033 | 44 |
| LX071-33 | 108.03 | 178.86 |  | 0.60 | 1.99499 | 0.03529 | 0.16261 | 0.00236 | 0.089 | 0.00138 |  | 971 | 13 | 1114 | 12 | 1404 | 29 |
| LX071-34 | 19.83 | 37.43 |  | 0.53 | 1.7273 | 0.05975 | 0.16875 | 0.00297 | 0.07426 | 0.00255 |  | 1005 | 16 | 1019 | 22 | 1049 | 68 |
| LX071-35 | 47.17 | 73.54 |  | 0.64 | 1.82237 | 0.05598 | 0.17715 | 0.00291 | 0.07463 | 0.00224 |  | 1051 | 16 | 1054 | 20 | 1058 | 60 |
| LX071-36 | 123.19 | 153.02 |  | 0.81 | 1.69862 | 0.03702 | 0.16548 | 0.00251 | 0.07447 | 0.00151 |  | 987 | 14 | 1008 | 14 | 1054 | 41 |
| LX071-37 | 48.3 | 137 |  | 0.35 | 1.75197 | 0.03522 | 0.1732 | 0.00257 | 0.07338 | 0.00134 |  | 1030 | 14 | 1028 | 13 | 1025 | 37 |
| LX071-38 | 61.23 | 79.11 |  | 0.77 | 1.72432 | 0.04932 | 0.17024 | 0.00281 | 0.07348 | 0.00205 |  | 1013 | 15 | 1018 | 18 | 1027 | 56 |
| LX071-39 | 110.75 | 142.34 |  | 0.78 | 2.87929 | 0.04943 | 0.22798 | 0.00331 | 0.09162 | 0.00135 |  | 1324 | 17 | 1377 | 13 | 1460 | 28 |
| LX03-4 (granite) | | | | | | | | | | | | | | | | | |
| LX034-01 | 147.6 | 169.24 |  | 0.87 | 1.1063 | 0.03381 | 0.1256 | 0.00346 | 0.06395 | 0.00164 |  | 763 | 20 | 756 | 16 | 740 | 53 |
| LX034-02 | 140.9 | 152.62 |  | 0.92 | 1.09615 | 0.03329 | 0.12475 | 0.00343 | 0.06379 | 0.00161 |  | 758 | 20 | 752 | 16 | 735 | 53 |
| LX034-03 | 182.82 | 217.99 |  | 0.84 | 1.11007 | 0.03205 | 0.12559 | 0.00343 | 0.06417 | 0.00149 |  | 763 | 20 | 758 | 15 | 747 | 48 |
| LX034-04 | 372.6 | 282.84 |  | 1.32 | 1.09354 | 0.03174 | 0.12501 | 0.00343 | 0.06351 | 0.00148 |  | 759 | 20 | 750 | 15 | 725 | 49 |
| LX034-05 | 156.05 | 175.07 |  | 0.89 | 1.07757 | 0.03356 | 0.12405 | 0.00344 | 0.06306 | 0.00165 |  | 754 | 20 | 742 | 16 | 710 | 55 |
| LX034-06 | 179.58 | 181.34 |  | 0.99 | 1.09602 | 0.03315 | 0.12383 | 0.00342 | 0.06425 | 0.0016 |  | 753 | 20 | 751 | 16 | 750 | 52 |
| LX034-07 | 204.23 | 204.38 |  | 1.00 | 1.10847 | 0.03272 | 0.12463 | 0.00344 | 0.06456 | 0.00154 |  | 757 | 20 | 757 | 16 | 760 | 49 |
| LX034-08 | 215.55 | 216.74 |  | 0.99 | 1.06642 | 0.03232 | 0.12489 | 0.00346 | 0.06198 | 0.00154 |  | 759 | 20 | 737 | 16 | 674 | 52 |
| LX034-09 | 198.1 | 197.65 |  | 1.00 | 1.09967 | 0.03231 | 0.12447 | 0.00345 | 0.06413 | 0.00151 |  | 756 | 20 | 753 | 16 | 746 | 49 |
| LX034-10 | 226.8 | 277.94 |  | 0.82 | 1.14171 | 0.03323 | 0.12367 | 0.00343 | 0.06701 | 0.00155 |  | 752 | 20 | 773 | 16 | 838 | 47 |
| LX034-11 | 484.77 | 289.41 |  | 1.68 | 1.08643 | 0.03148 | 0.12451 | 0.00345 | 0.06334 | 0.00145 |  | 757 | 20 | 747 | 15 | 720 | 48 |
| LX034-12 | 319.05 | 244.07 |  | 1.31 | 1.12249 | 0.03323 | 0.12645 | 0.00352 | 0.06443 | 0.00153 |  | 768 | 20 | 764 | 16 | 756 | 49 |
| LX034-13 | 322.63 | 266.5 |  | 1.21 | 1.0811 | 0.03145 | 0.12387 | 0.00346 | 0.06334 | 0.00144 |  | 753 | 20 | 744 | 15 | 720 | 48 |
| LX034-14 | 166.77 | 182.11 |  | 0.92 | 1.12031 | 0.0337 | 0.12591 | 0.00354 | 0.06458 | 0.00155 |  | 765 | 20 | 763 | 16 | 761 | 50 |
| LX034-15 | 326.86 | 354.92 |  | 0.92 | 1.1168 | 0.03195 | 0.12567 | 0.00351 | 0.0645 | 0.00141 |  | 763 | 20 | 761 | 15 | 758 | 46 |
| LX034-16 | 417.25 | 358.11 |  | 1.17 | 1.10832 | 0.03177 | 0.1248 | 0.00349 | 0.06445 | 0.00141 |  | 758 | 20 | 757 | 15 | 757 | 46 |
| LX034-17 | 170.34 | 188.66 |  | 0.90 | 1.1277 | 0.03363 | 0.12642 | 0.00357 | 0.06474 | 0.00152 |  | 767 | 20 | 767 | 16 | 766 | 49 |
| LX034-18 | 77.47 | 109.29 |  | 0.71 | 1.11581 | 0.03697 | 0.12506 | 0.00358 | 0.06475 | 0.0018 |  | 760 | 21 | 761 | 18 | 766 | 58 |
| LX034-19 | 165.51 | 181.56 |  | 0.91 | 1.08714 | 0.03444 | 0.12411 | 0.00355 | 0.06357 | 0.00164 |  | 754 | 20 | 747 | 17 | 727 | 54 |
| LX034-20 | 172.48 | 179.42 |  | 0.96 | 1.11663 | 0.03385 | 0.1254 | 0.00357 | 0.06462 | 0.00155 |  | 762 | 20 | 761 | 16 | 762 | 50 |
| LX034-21 | 121.2 | 181.17 |  | 0.67 | 1.12332 | 0.03484 | 0.12622 | 0.00361 | 0.06458 | 0.00161 |  | 766 | 21 | 765 | 17 | 761 | 52 |
| LX034-22 | 115.65 | 133.83 |  | 0.86 | 1.17575 | 0.04041 | 0.12616 | 0.00368 | 0.06763 | 0.00198 |  | 766 | 21 | 789 | 19 | 857 | 60 |
| LX034-23 | 174.24 | 199.95 |  | 0.87 | 1.12553 | 0.03484 | 0.12588 | 0.00361 | 0.06488 | 0.0016 |  | 764 | 21 | 766 | 17 | 771 | 51 |
| LX034-24 | 103.8 | 124.37 |  | 0.83 | 1.12987 | 0.03642 | 0.12652 | 0.00366 | 0.0648 | 0.00171 |  | 768 | 21 | 768 | 17 | 768 | 55 |
| LX034-25 | 247.68 | 209.53 |  | 1.18 | 1.13812 | 0.0347 | 0.12597 | 0.00363 | 0.06556 | 0.00156 |  | 765 | 21 | 772 | 16 | 792 | 49 |
| LX034-26 | 140.16 | 148.52 |  | 0.94 | 1.11442 | 0.03607 | 0.12667 | 0.00369 | 0.06384 | 0.00168 |  | 769 | 21 | 760 | 17 | 736 | 55 |
| LX034-27 | 134.68 | 163.49 |  | 0.82 | 1.13238 | 0.03792 | 0.12543 | 0.00367 | 0.0655 | 0.00181 |  | 762 | 21 | 769 | 18 | 791 | 57 |
| LX034-28 | 229.43 | 202 |  | 1.14 | 1.11075 | 0.03406 | 0.12599 | 0.00365 | 0.06397 | 0.00152 |  | 765 | 21 | 759 | 16 | 741 | 50 |
| LX034-29 | 255.87 | 212.55 |  | 1.20 | 1.11583 | 0.03406 | 0.12617 | 0.00365 | 0.06417 | 0.00151 |  | 766 | 21 | 761 | 16 | 747 | 49 |
| LX034-30 | 178 | 208.14 |  | 0.86 | 1.10632 | 0.03533 | 0.12576 | 0.00367 | 0.06383 | 0.00162 |  | 764 | 21 | 756 | 17 | 736 | 53 |
| LX034-31 | 212.5 | 174.31 |  | 1.22 | 1.19574 | 0.03712 | 0.13253 | 0.00387 | 0.06546 | 0.00158 |  | 802 | 22 | 799 | 17 | 789 | 50 |
| LX034-32 | 156.87 | 171.43 |  | 0.92 | 1.21665 | 0.03806 | 0.13245 | 0.00388 | 0.06665 | 0.00162 |  | 802 | 22 | 808 | 17 | 827 | 50 |
| LX034-33 | 122.34 | 152.82 |  | 0.80 | 1.08419 | 0.0347 | 0.12623 | 0.00371 | 0.06232 | 0.00158 |  | 766 | 21 | 746 | 17 | 685 | 53 |
| LX034-34 | 123.02 | 128.88 |  | 0.95 | 1.07568 | 0.03711 | 0.12603 | 0.00375 | 0.06192 | 0.00177 |  | 765 | 22 | 742 | 18 | 671 | 60 |
| LX034-35 | 156.54 | 180.84 |  | 0.87 | 1.09706 | 0.03576 | 0.12645 | 0.00374 | 0.06294 | 0.00164 |  | 768 | 21 | 752 | 17 | 706 | 54 |
| LX034-36 | 291.57 | 384.19 |  | 0.76 | 1.11179 | 0.03352 | 0.12596 | 0.00369 | 0.06403 | 0.00144 |  | 765 | 21 | 759 | 16 | 743 | 47 |
| LX04-1 (meta-diorite) | | | | | | | | | | | | | | | | | |
| LX041-01 | 139.44 | 549.97 |  | 0.25 | 1.09241 | 0.01755 | 0.12501 | 0.00182 | 0.0634 | 0.00082 |  | 759 | 10 | 750 | 9 | 722 | 27 |
| LX041-02 | 14.41 | 824.14 |  | 0.02 | 3.54558 | 0.05063 | 0.23081 | 0.00331 | 0.11145 | 0.00116 |  | 1339 | 17 | 1537 | 11 | 1823 | 19 |
| LX041-03 | 90.4 | 381.75 |  | 0.24 | 1.111 | 0.01915 | 0.12622 | 0.00186 | 0.06386 | 0.00093 |  | 766 | 11 | 759 | 9 | 737 | 30 |
| LX041-04 | 235.1 | 1053.09 |  | 0.22 | 5.77808 | 0.0819 | 0.35152 | 0.00504 | 0.11925 | 0.00122 |  | 1942 | 24 | 1943 | 12 | 1945 | 18 |
| LX041-05 | 207.92 | 684.73 |  | 0.30 | 7.00941 | 0.10043 | 0.36909 | 0.00531 | 0.13777 | 0.00144 |  | 2025 | 25 | 2113 | 13 | 2199 | 18 |
| LX041-06 | 158.04 | 769.22 |  | 0.21 | 4.82767 | 0.06945 | 0.3082 | 0.00443 | 0.11364 | 0.0012 |  | 1732 | 22 | 1790 | 12 | 1858 | 19 |
| LX041-07 | 78 | 307.4 |  | 0.25 | 1.19552 | 0.0208 | 0.13316 | 0.00196 | 0.06513 | 0.00096 |  | 806 | 11 | 799 | 10 | 779 | 31 |
| LX041-08 | 347.31 | 1700.2 |  | 0.20 | 5.72982 | 0.08064 | 0.34517 | 0.00493 | 0.12042 | 0.00122 |  | 1912 | 24 | 1936 | 12 | 1963 | 18 |
| LX041-09 | 102.99 | 456.94 |  | 0.23 | 1.10745 | 0.01788 | 0.1254 | 0.00182 | 0.06406 | 0.00084 |  | 762 | 10 | 757 | 9 | 744 | 27 |
| LX041-10 | 263.27 | 1048.84 |  | 0.25 | 5.20997 | 0.0743 | 0.33594 | 0.00481 | 0.1125 | 0.00117 |  | 1867 | 23 | 1854 | 12 | 1840 | 19 |
| LX041-11 | 7.47 | 93.92 |  | 0.08 | 19.15163 | 0.29832 | 0.60251 | 0.00919 | 0.23059 | 0.00281 |  | 3040 | 37 | 3050 | 15 | 3056 | 19 |
| LX041-12 | 137.28 | 524.19 |  | 0.26 | 1.21173 | 0.0197 | 0.13312 | 0.00194 | 0.06603 | 0.00087 |  | 806 | 11 | 806 | 9 | 807 | 27 |
| LX041-13 | 118.64 | 140.9 |  | 0.84 | 6.2377 | 0.09911 | 0.35407 | 0.00526 | 0.1278 | 0.00163 |  | 1954 | 25 | 2010 | 14 | 2068 | 22 |
| LX041-14 | 57.2 | 183.7 |  | 0.31 | 13.49955 | 0.19647 | 0.52124 | 0.00758 | 0.18788 | 0.00203 |  | 2704 | 32 | 2715 | 14 | 2724 | 18 |
| LX041-15 | 80.18 | 110.83 |  | 0.72 | 5.30936 | 0.08513 | 0.33786 | 0.00502 | 0.114 | 0.00148 |  | 1876 | 24 | 1870 | 14 | 1864 | 23 |
| LX041-16 | 12.58 | 81.66 |  | 0.15 | 8.28435 | 0.13671 | 0.41979 | 0.00639 | 0.14316 | 0.00194 |  | 2260 | 29 | 2263 | 15 | 2266 | 23 |
| LX041-17 | 135.78 | 1174.61 |  | 0.12 | 4.12796 | 0.0584 | 0.26886 | 0.00383 | 0.11138 | 0.00114 |  | 1535 | 19 | 1660 | 12 | 1822 | 19 |
| LX041-18 | 132.63 | 963.16 |  | 0.14 | 3.95703 | 0.05615 | 0.25656 | 0.00366 | 0.11188 | 0.00116 |  | 1472 | 19 | 1625 | 12 | 1830 | 19 |
| LX041-19 | 96.53 | 425.46 |  | 0.23 | 1.13799 | 0.01935 | 0.12713 | 0.00186 | 0.06493 | 0.00093 |  | 772 | 11 | 772 | 9 | 772 | 30 |
| LX041-20 | 137.14 | 330.14 |  | 0.42 | 6.77209 | 0.09839 | 0.38233 | 0.0055 | 0.12848 | 0.00139 |  | 2087 | 26 | 2082 | 13 | 2077 | 19 |
| LX041-21 | 206.67 | 1089.99 |  | 0.19 | 8.24006 | 0.11662 | 0.38053 | 0.00543 | 0.15708 | 0.00162 |  | 2079 | 25 | 2258 | 13 | 2424 | 17 |
| LX041-22 | 76.85 | 359.24 |  | 0.21 | 1.12489 | 0.02016 | 0.12179 | 0.0018 | 0.067 | 0.00103 |  | 741 | 10 | 765 | 10 | 838 | 32 |
| LX041-23 | 155.4 | 513.03 |  | 0.30 | 1.11187 | 0.01769 | 0.12458 | 0.0018 | 0.06474 | 0.00083 |  | 757 | 10 | 759 | 9 | 766 | 27 |
| LX041-24 | 398.37 | 1016.49 |  | 0.39 | 11.87314 | 0.16629 | 0.48177 | 0.00685 | 0.17877 | 0.0018 |  | 2535 | 30 | 2594 | 13 | 2642 | 17 |
| LX041-25 | 294.19 | 586.6 |  | 0.50 | 6.41613 | 0.09209 | 0.37045 | 0.0053 | 0.12563 | 0.00133 |  | 2032 | 25 | 2035 | 13 | 2038 | 19 |
| LX041-26 | 236.63 | 871.32 |  | 0.27 | 1.12586 | 0.01727 | 0.1262 | 0.00181 | 0.06471 | 0.00078 |  | 766 | 10 | 766 | 8 | 765 | 25 |
| LX041-27 | 344.12 | 1686.77 |  | 0.20 | 5.33279 | 0.07503 | 0.32459 | 0.00461 | 0.11917 | 0.00121 |  | 1812 | 22 | 1874 | 12 | 1944 | 18 |
| LX041-28 | 127.66 | 464.67 |  | 0.27 | 4.44002 | 0.06443 | 0.29005 | 0.00415 | 0.11104 | 0.00121 |  | 1642 | 21 | 1720 | 12 | 1816 | 20 |
| LX041-29 | 190.78 | 1413.92 |  | 0.13 | 4.79505 | 0.06778 | 0.30724 | 0.00436 | 0.1132 | 0.00116 |  | 1727 | 22 | 1784 | 12 | 1852 | 18 |
| LX041-30 | 839.06 | 1254.84 |  | 0.67 | 3.34154 | 0.04771 | 0.21963 | 0.00312 | 0.11036 | 0.00116 |  | 1280 | 17 | 1491 | 11 | 1805 | 19 |
| LX041-31 | 119.5 | 1045.01 |  | 0.11 | 4.81017 | 0.06873 | 0.31001 | 0.00441 | 0.11255 | 0.00119 |  | 1741 | 22 | 1787 | 12 | 1841 | 19 |
| LX041-32 | 21.45 | 369.85 |  | 0.06 | 4.59013 | 0.06813 | 0.29769 | 0.00428 | 0.11184 | 0.00127 |  | 1680 | 21 | 1748 | 12 | 1830 | 20 |
| LX041-33 | 693.25 | 510.29 |  | 1.36 | 5.00736 | 0.07348 | 0.32424 | 0.00465 | 0.11202 | 0.00125 |  | 1810 | 23 | 1821 | 12 | 1832 | 20 |
| LX041-34 | 98.09 | 353.88 |  | 0.28 | 1.14736 | 0.02127 | 0.12526 | 0.00186 | 0.06644 | 0.00108 |  | 761 | 11 | 776 | 10 | 820 | 34 |
| LX041-35 | 153.88 | 565.87 |  | 0.27 | 1.11287 | 0.01779 | 0.12354 | 0.00178 | 0.06534 | 0.00085 |  | 751 | 10 | 760 | 9 | 785 | 27 |
| LX041-36 | 157.14 | 621.03 |  | 0.25 | 0.99529 | 0.01615 | 0.10979 | 0.00158 | 0.06576 | 0.00087 |  | 672 | 9 | 701 | 8 | 799 | 28 |
| LX041-37 | 152.62 | 563.72 |  | 0.27 | 1.1278 | 0.01778 | 0.12423 | 0.00178 | 0.06585 | 0.00083 |  | 755 | 10 | 767 | 8 | 802 | 26 |
| LX041-38 | 203.22 | 575.43 |  | 0.35 | 4.98141 | 0.07499 | 0.32295 | 0.00466 | 0.11188 | 0.00131 |  | 1804 | 23 | 1816 | 13 | 1830 | 21 |
| LX041-39 | 122.08 | 1145.33 |  | 0.11 | 5.02982 | 0.07204 | 0.32353 | 0.0046 | 0.11277 | 0.0012 |  | 1807 | 22 | 1824 | 12 | 1845 | 19 |
| LX041-40 | 215.91 | 661.2 |  | 0.33 | 4.57833 | 0.06519 | 0.30545 | 0.00433 | 0.10872 | 0.00114 |  | 1718 | 21 | 1745 | 12 | 1778 | 19 |
| LX041-41 | 99.53 | 380.34 |  | 0.26 | 1.15098 | 0.01994 | 0.12853 | 0.00188 | 0.06495 | 0.00096 |  | 780 | 11 | 778 | 9 | 773 | 31 |
| LX041-42 | 77.3 | 331.46 |  | 0.23 | 1.11781 | 0.01933 | 0.12532 | 0.00182 | 0.0647 | 0.00095 |  | 761 | 10 | 762 | 9 | 765 | 31 |
| LX041-43 | 135.49 | 571.81 |  | 0.24 | 1.13045 | 0.01781 | 0.12581 | 0.0018 | 0.06517 | 0.00083 |  | 764 | 10 | 768 | 8 | 780 | 26 |
| LX041-44 | 134.16 | 740.53 |  | 0.18 | 5.60034 | 0.08025 | 0.34549 | 0.0049 | 0.11757 | 0.00125 |  | 1913 | 24 | 1916 | 12 | 1920 | 19 |
| LX041-45 | 209.29 | 362.05 |  | 0.58 | 0.79204 | 0.01444 | 0.09089 | 0.00133 | 0.06321 | 0.001 |  | 561 | 8 | 592 | 8 | 715 | 33 |
| LX041-46 | 100.57 | 361.03 |  | 0.28 | 1.11333 | 0.01991 | 0.12453 | 0.00181 | 0.06485 | 0.001 |  | 757 | 10 | 760 | 10 | 769 | 32 |
| LX041-47 | 209.76 | 1297.99 |  | 0.16 | 4.16732 | 0.05842 | 0.26781 | 0.00377 | 0.11287 | 0.00115 |  | 1530 | 19 | 1668 | 11 | 1846 | 18 |
| LX041-48 | 130.64 | 456.9 |  | 0.29 | 1.13402 | 0.01894 | 0.12353 | 0.00178 | 0.06659 | 0.00093 |  | 751 | 10 | 770 | 9 | 825 | 29 |
